# Supplementary material for: Tin(iv) chloride mediated (3 + 2) annulation of trans-2-aroyl-3-styrylcyclopropane-1,1-dicarboxylates with nitriles: diastereoselective access to 5-vinyl-1-pyrroline derivatives
Source: Royal Society of Chemistry journal article supplement (doi:10.1039/d1ra01194d), 2021-01-01
Supplement: d1ra01194d1.pdf [file d1ra01194d1.pdf]

# Electronic Supplementary Information

## Tin(IV) Chloride Mediated (3+2) Annulation of *trans*-2-Aroyl-3-styrylcyclopropane-1,1-dicarboxylates with Nitriles: Diastereoselective Access to 5-Vinyl-1-pyrroline Derivatives

Murugesan Thangamani, Subaramaniam Thangamalar and Kannupal Srinivasan\*

*School of Chemistry, Bharathidasan University, Tiruchirapalli 620 024, Tamil Nadu, India*

*Fax: (+91)-431-2407045; Phone: (+91)-431-2407053-538; Email.id: [srinivasank@bdu.ac.in](mailto:srinivasank@bdu.ac.in)*

### Contents

Copies of <sup>1</sup>H NMR and <sup>13</sup>C NMR for all products.....S2-S37

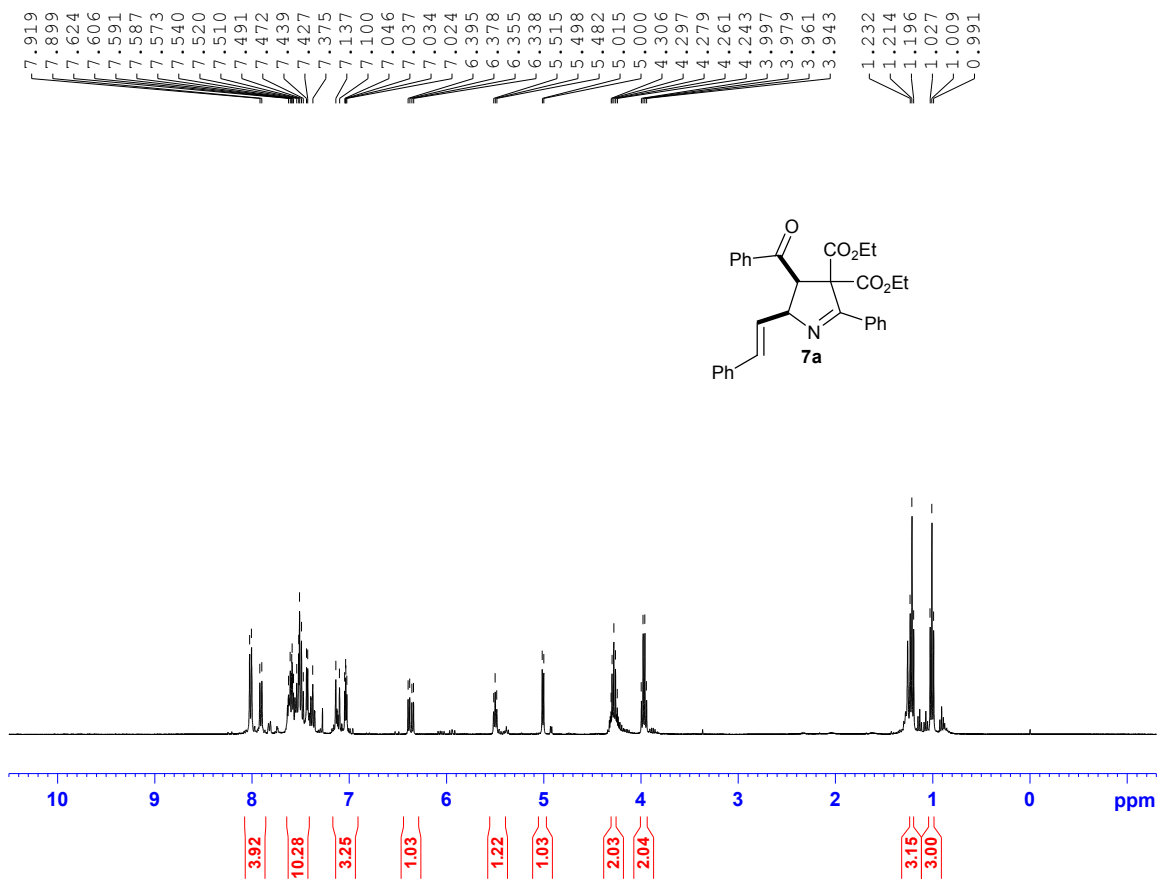

**Figure 1.**  $^1\text{H}$  NMR (400 MHz,  $\text{CDCl}_3$ ) spectrum of **7a**

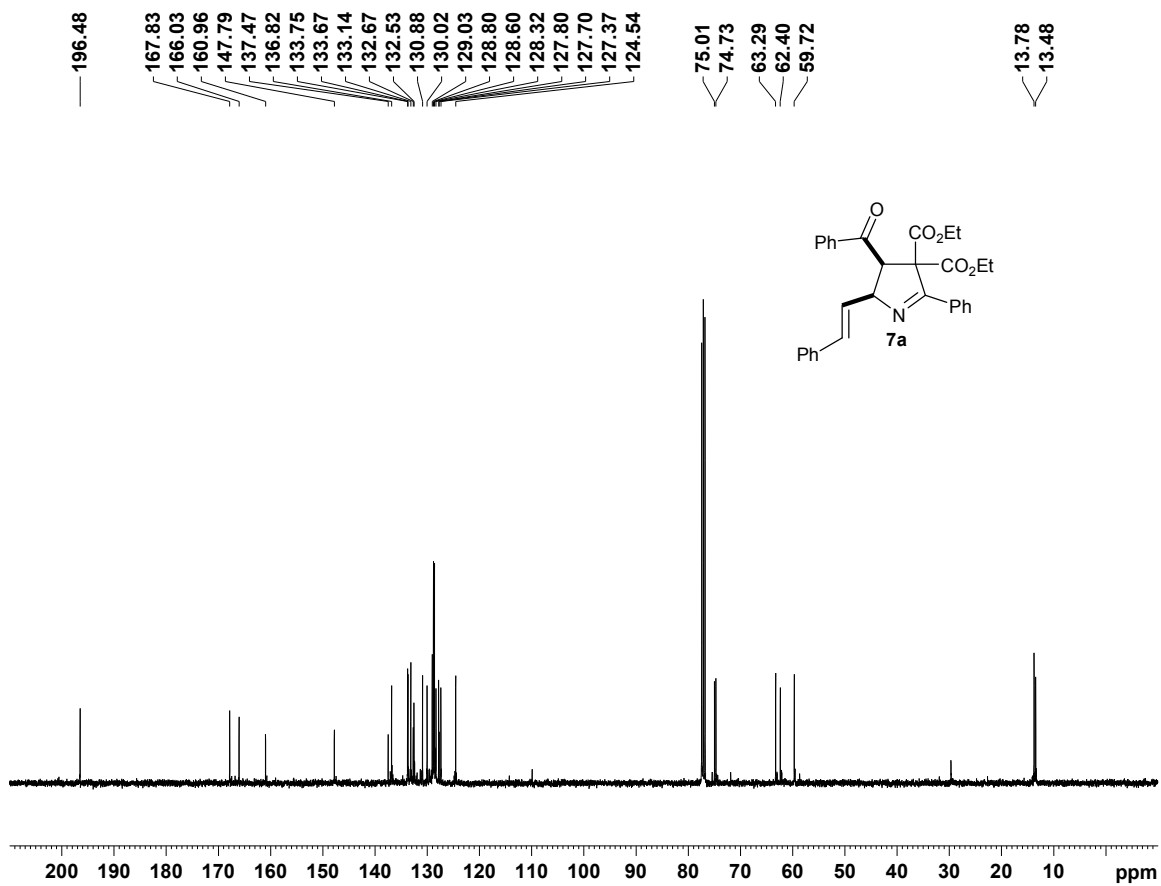

**Figure 2.** <sup>13</sup>C NMR (100 MHz, CDCl<sub>3</sub>) spectrum of **7a**

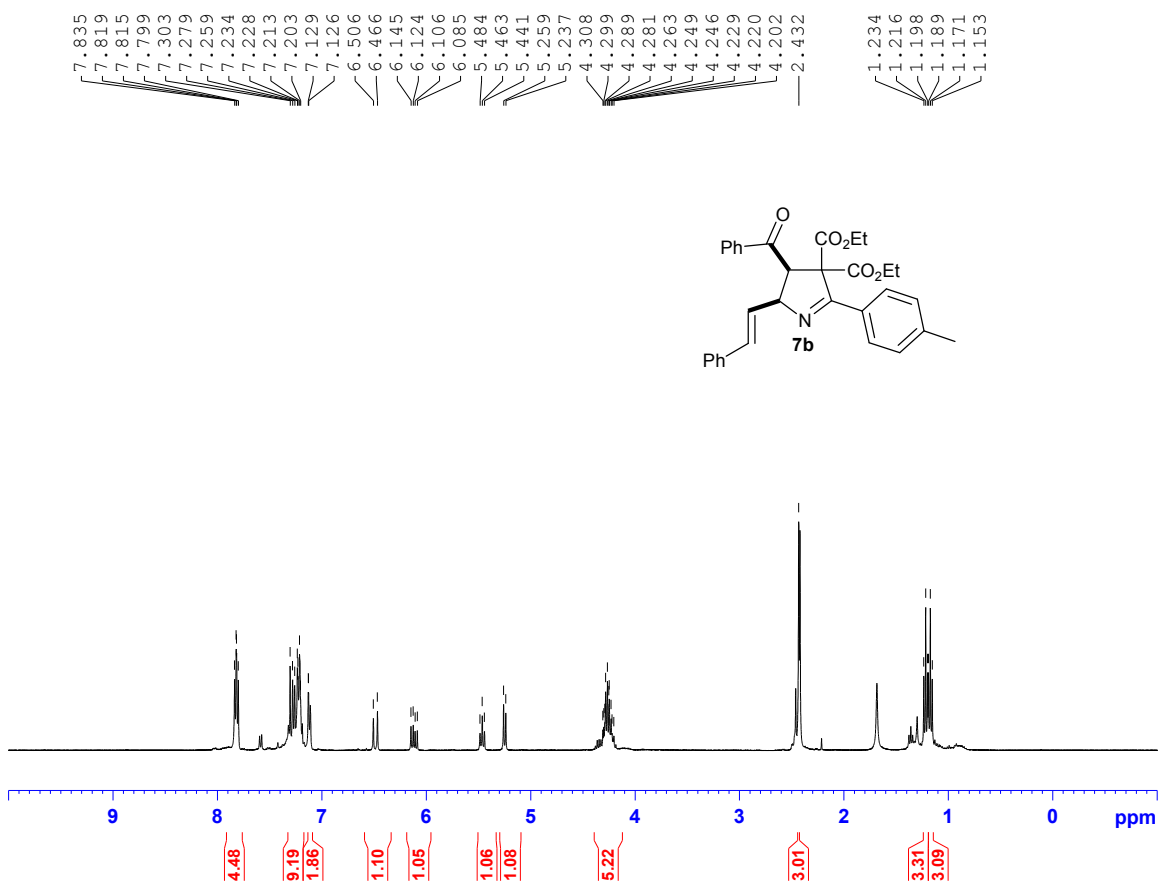

**Figure 3.** <sup>1</sup>H NMR (400 MHz, CDCl<sub>3</sub>) spectrum of **7b**

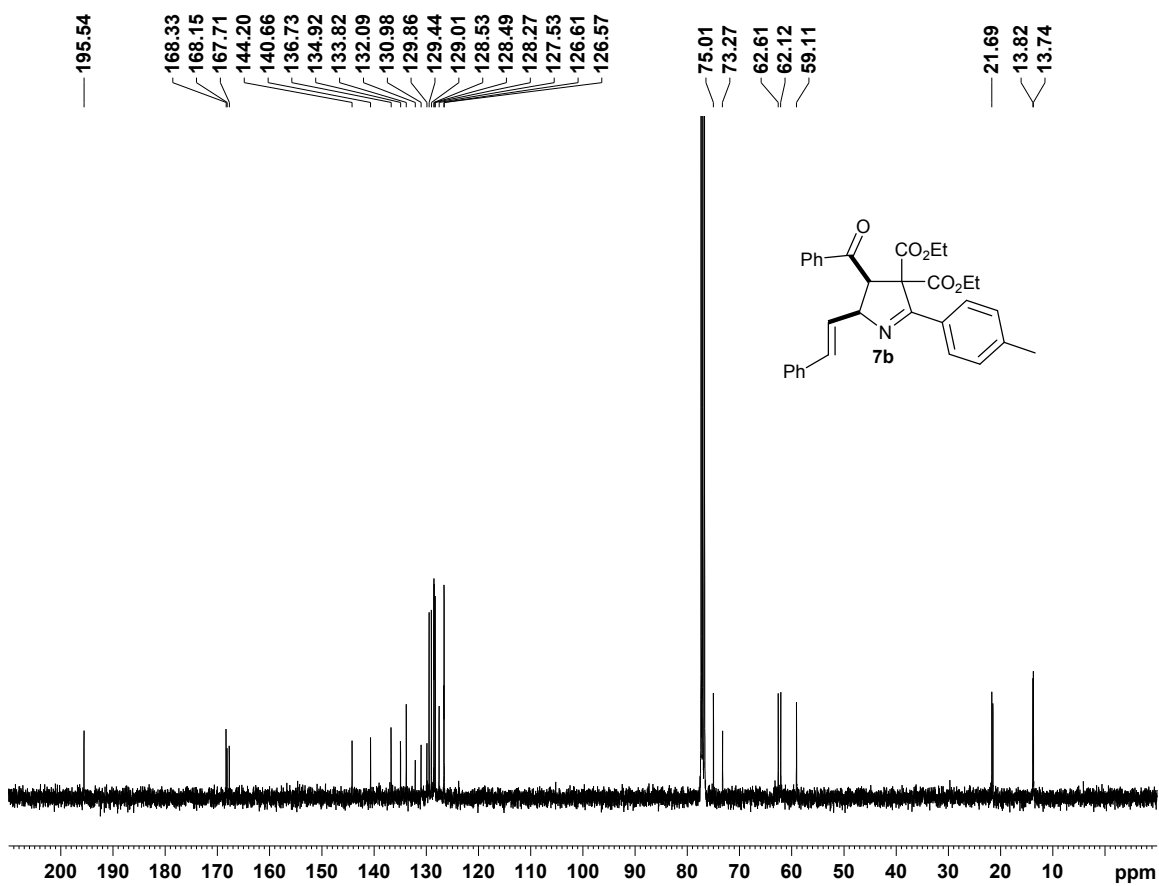

Figure 4. <sup>13</sup>C NMR (100 MHz, CDCl<sub>3</sub>) spectrum of **7b**

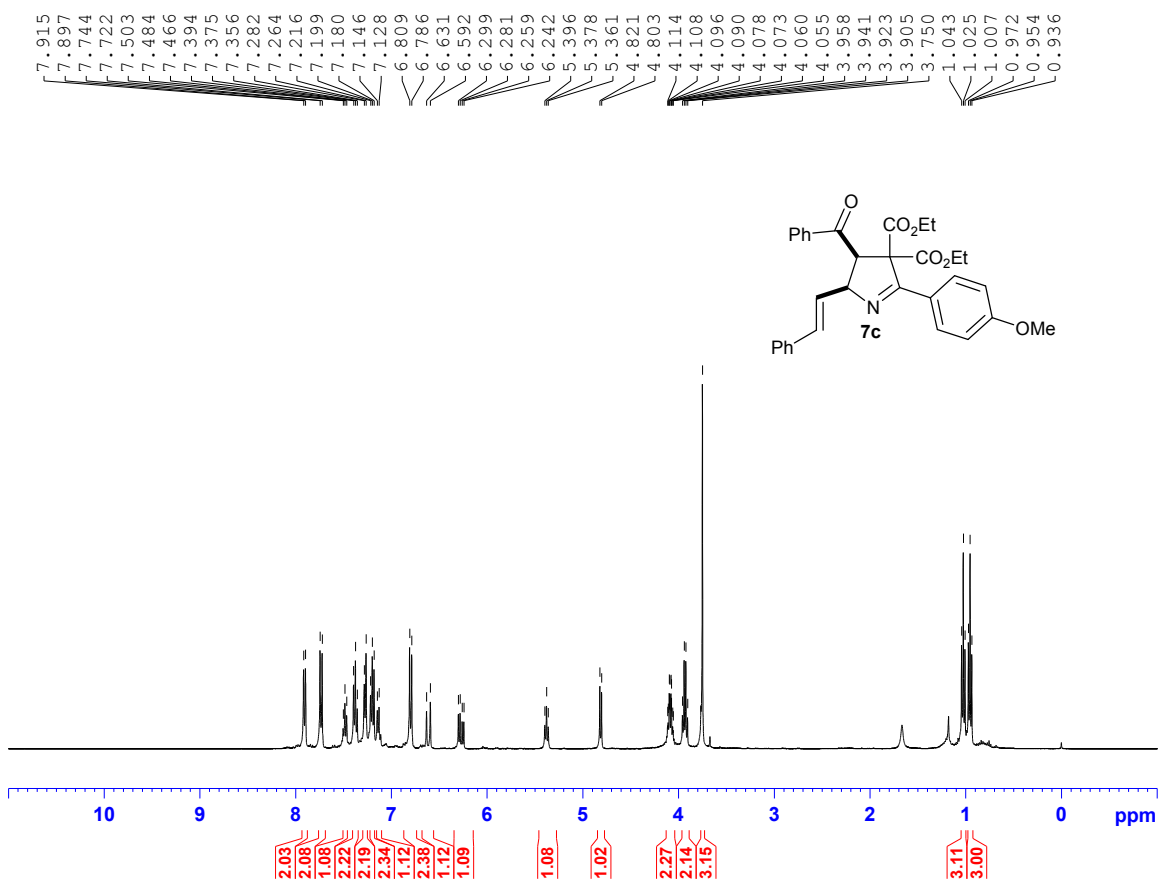

**Figure 5.**  $^{13}\text{C}$  NMR (100 MHz,  $\text{CDCl}_3$ ) spectrum of **7c**

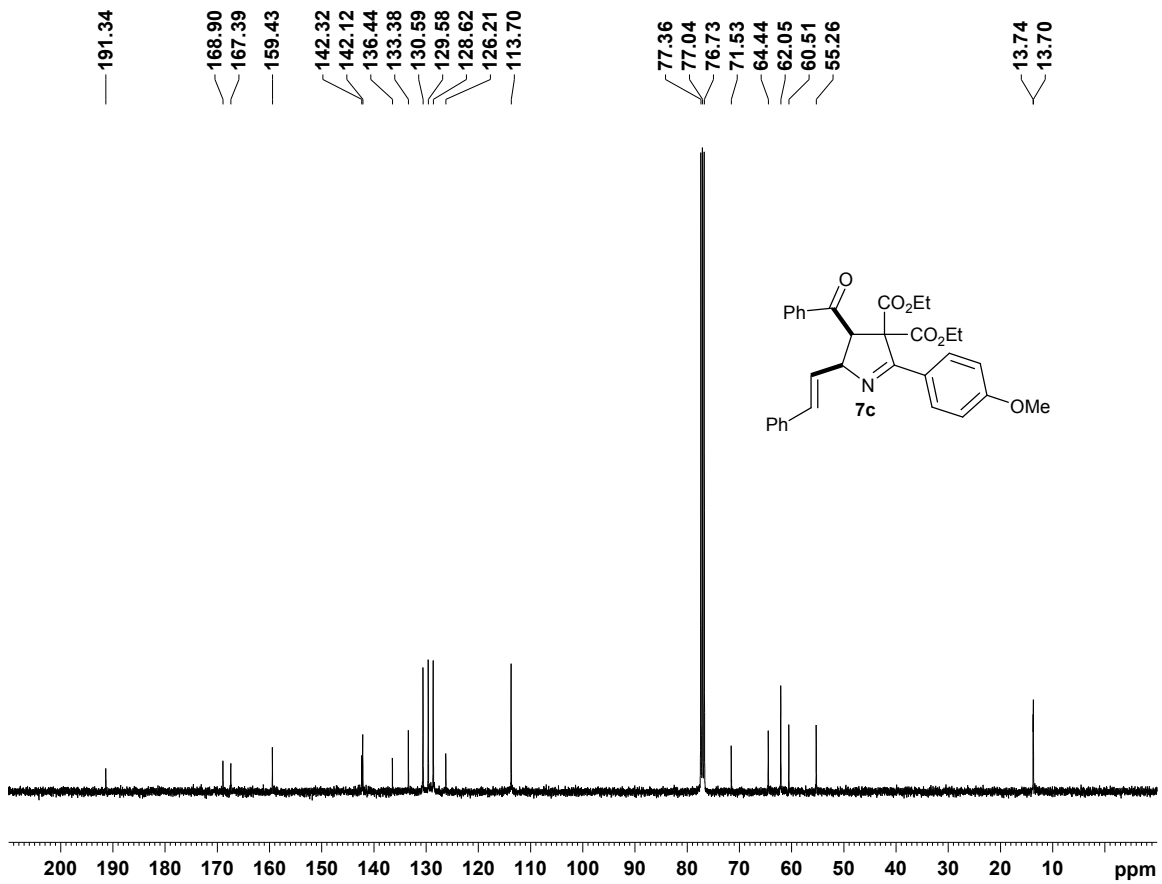

**Figure 6 .**  $^{13}\text{C}$  NMR (400 MHz,  $\text{CDCl}_3$ ) spectrum of **7c**

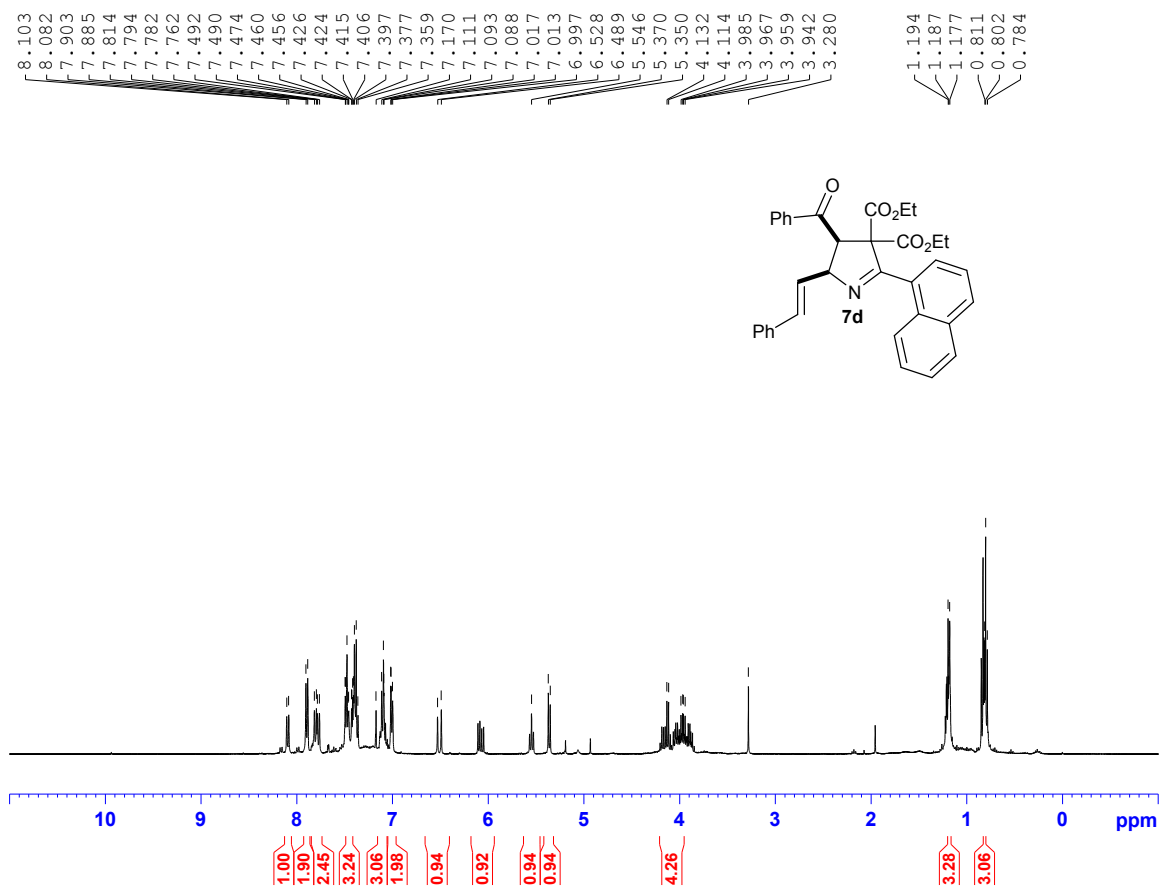

**Figure 7.** <sup>1</sup>H NMR (400 MHz, CDCl<sub>3</sub>) spectrum of **7d**



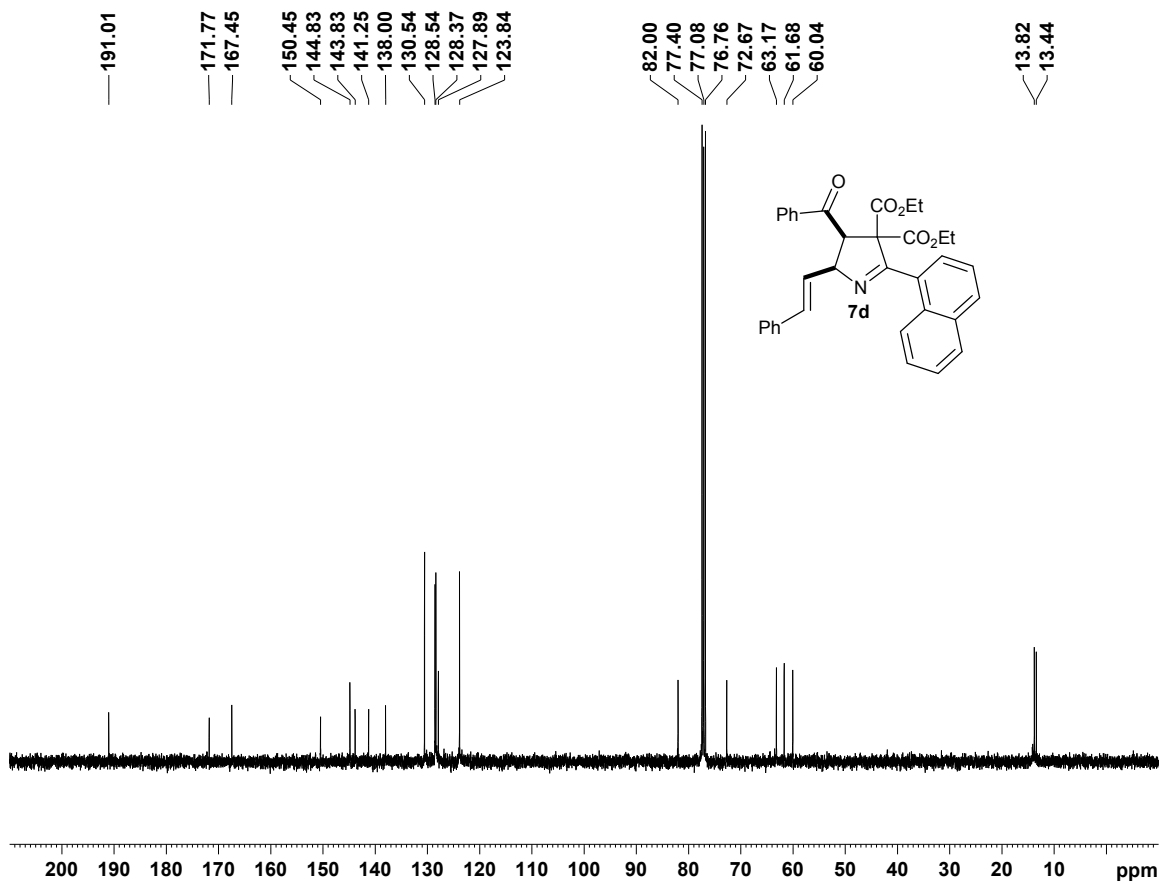

**Figure 8.**  $^{13}\text{C}$  NMR (100 MHz,  $\text{CDCl}_3$ ) spectrum of **7d**

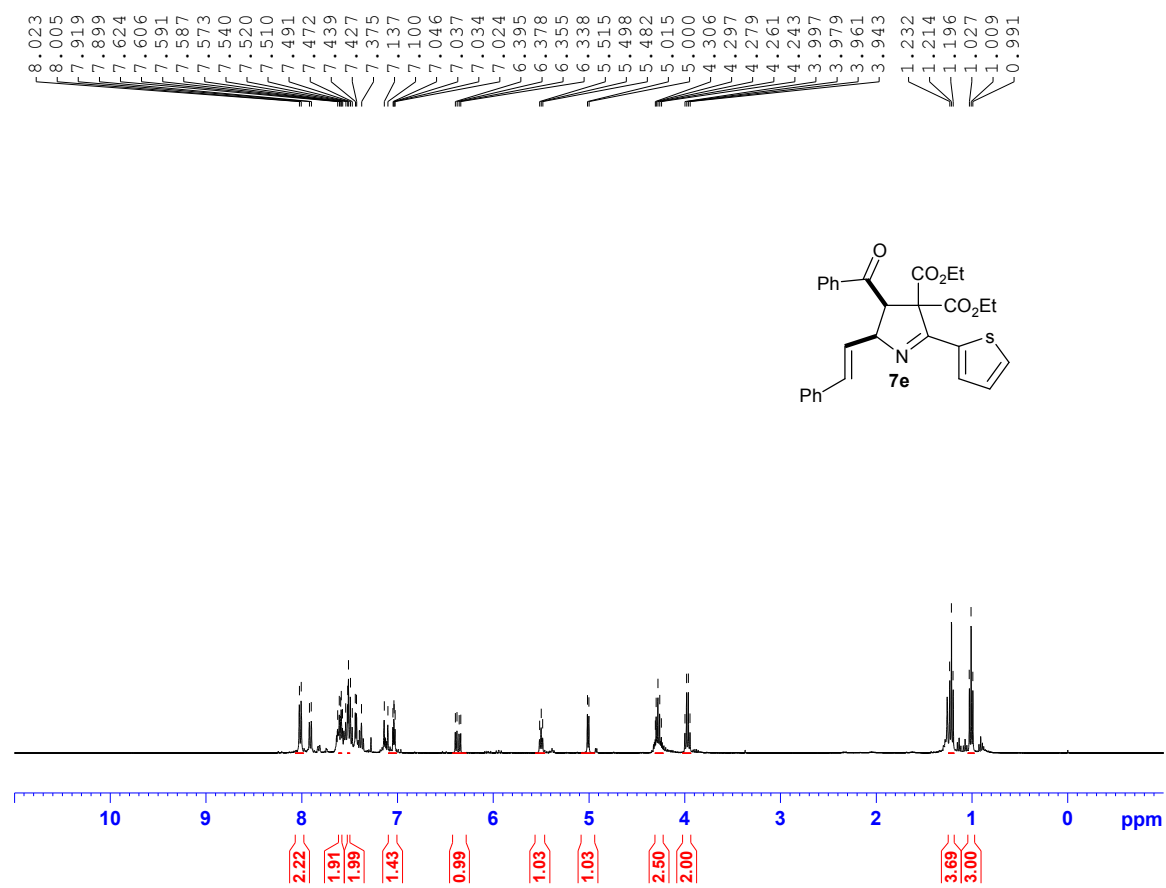

**Figure 9.** <sup>1</sup>H NMR (400 MHz, CDCl<sub>3</sub>) spectrum of **7e**

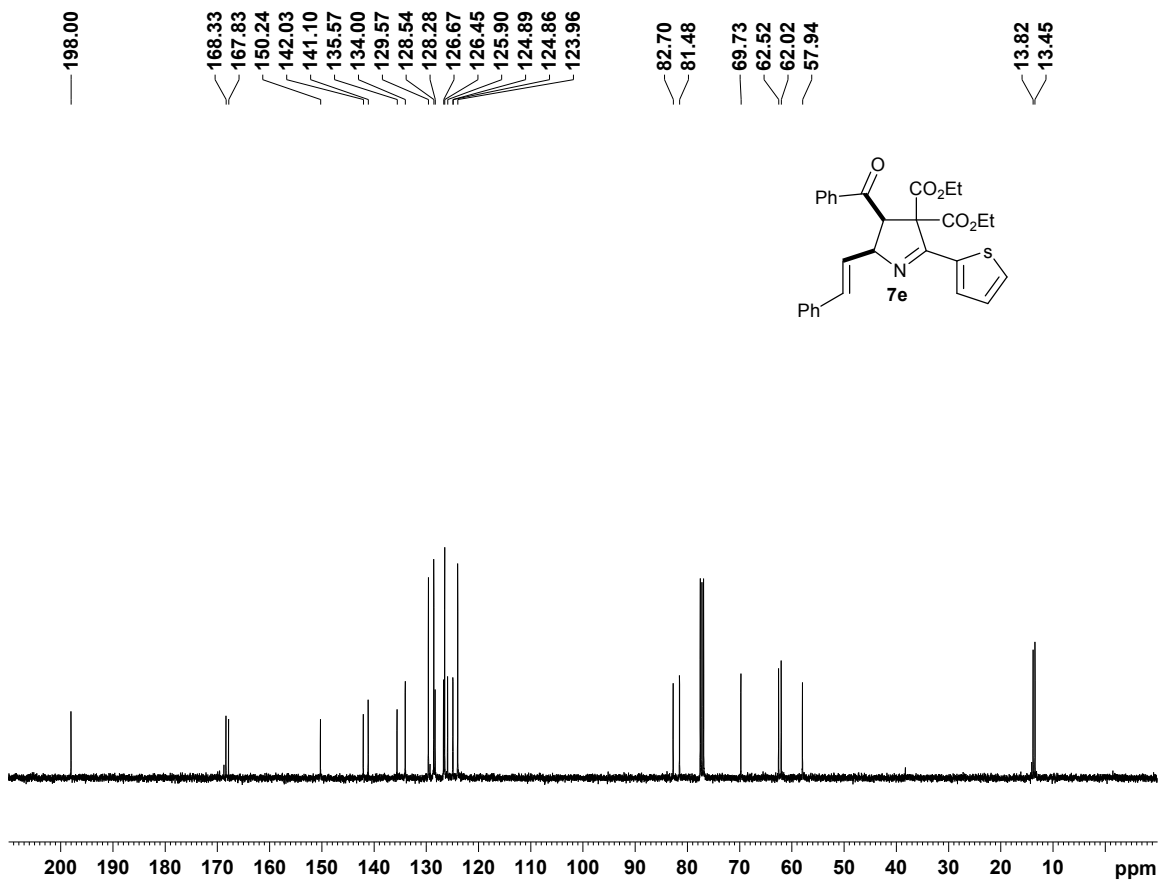

Figure 10. <sup>13</sup>C NMR (100 MHz, CDCl<sub>3</sub>) spectrum of **7e**

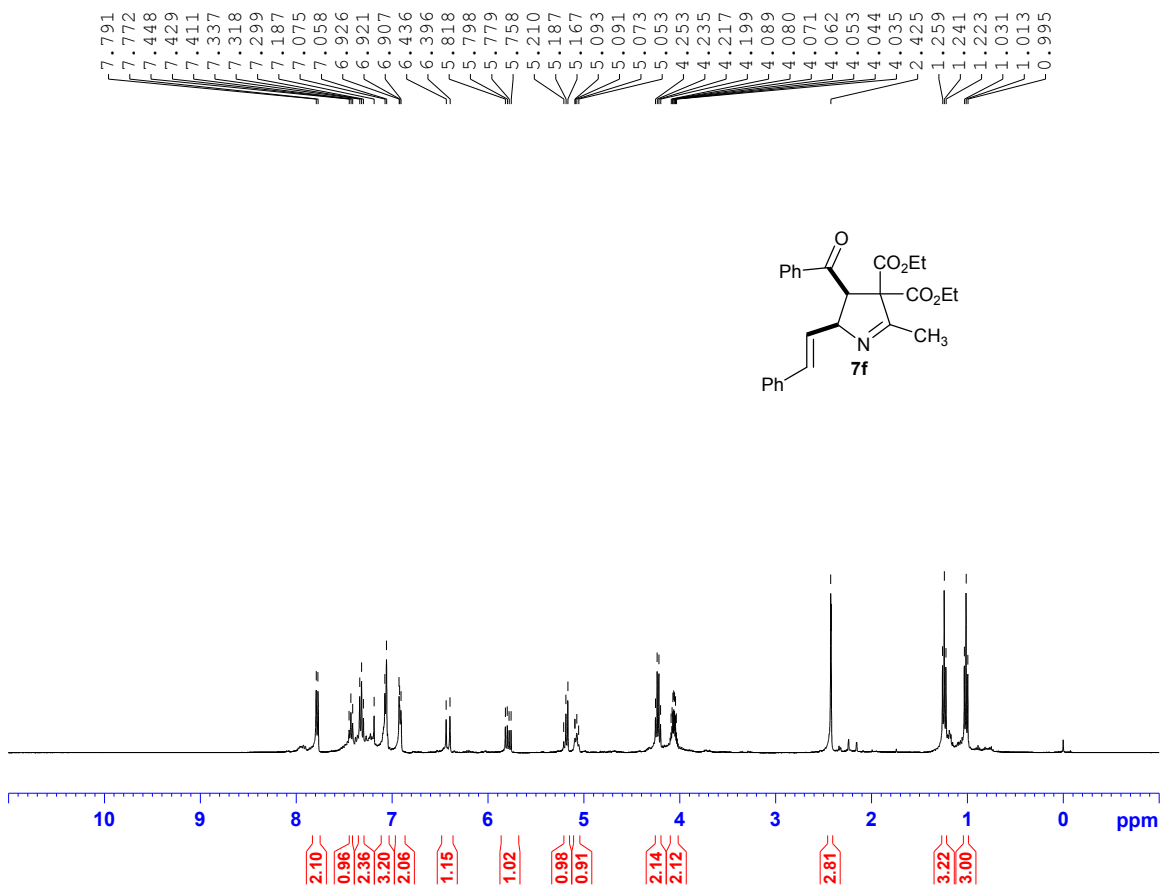

Figure 11. <sup>1</sup>H NMR (400 MHz, CDCl<sub>3</sub>) spectrum of **7f**

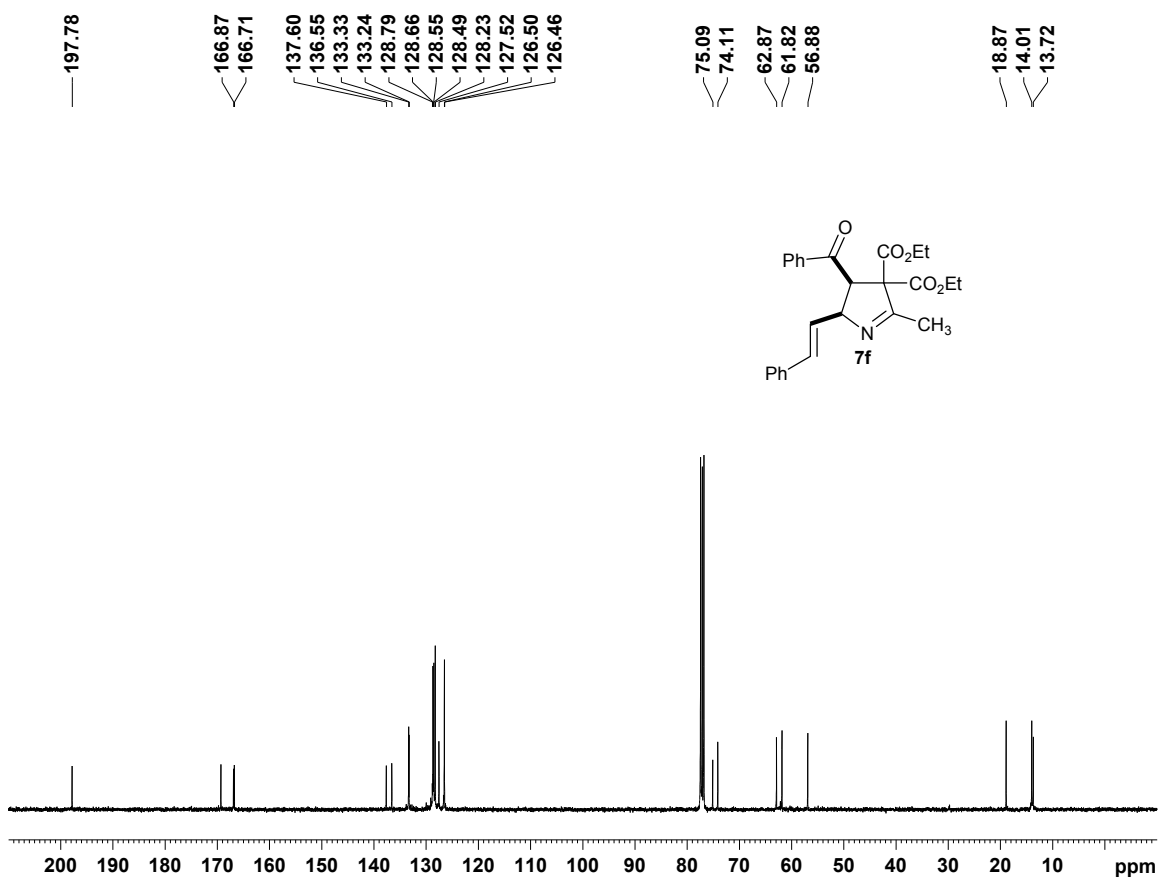

Figure 12.  $^{13}\text{C}$  NMR (100 MHz,  $\text{CDCl}_3$ ) spectrum of **7f**

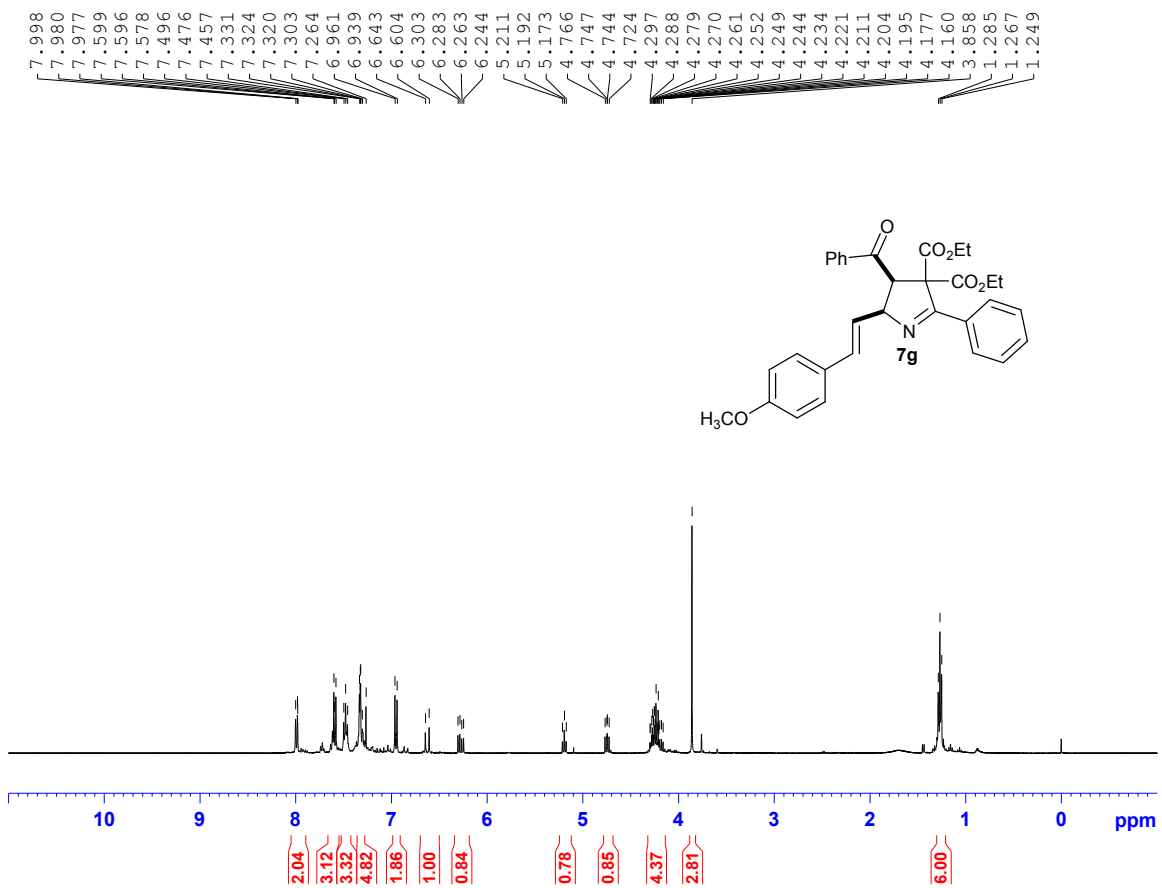

**Figure 13.**  $^1\text{H}$  NMR (400 MHz,  $\text{CDCl}_3$ ) spectrum of **7g**

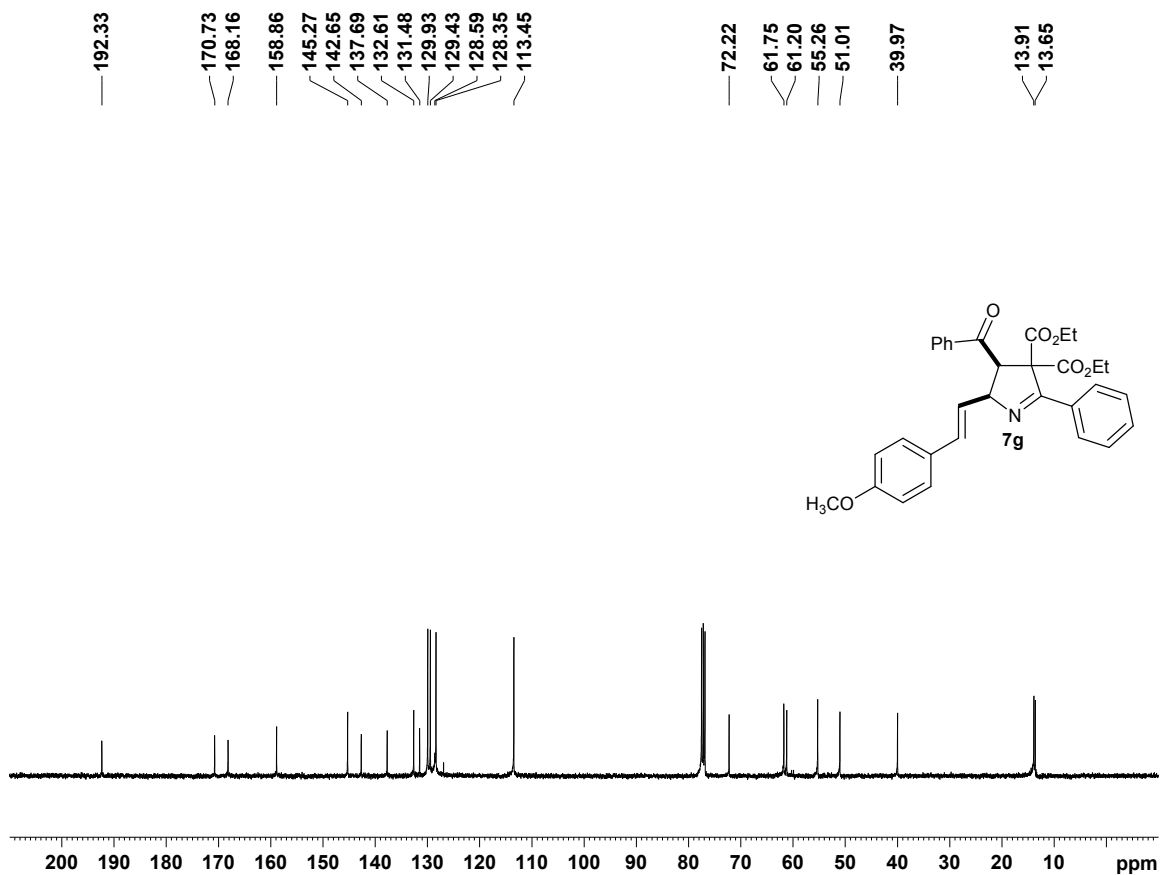

**Figure 14.** <sup>13</sup>C NMR (100 MHz, CDCl<sub>3</sub>) spectrum of **7g**

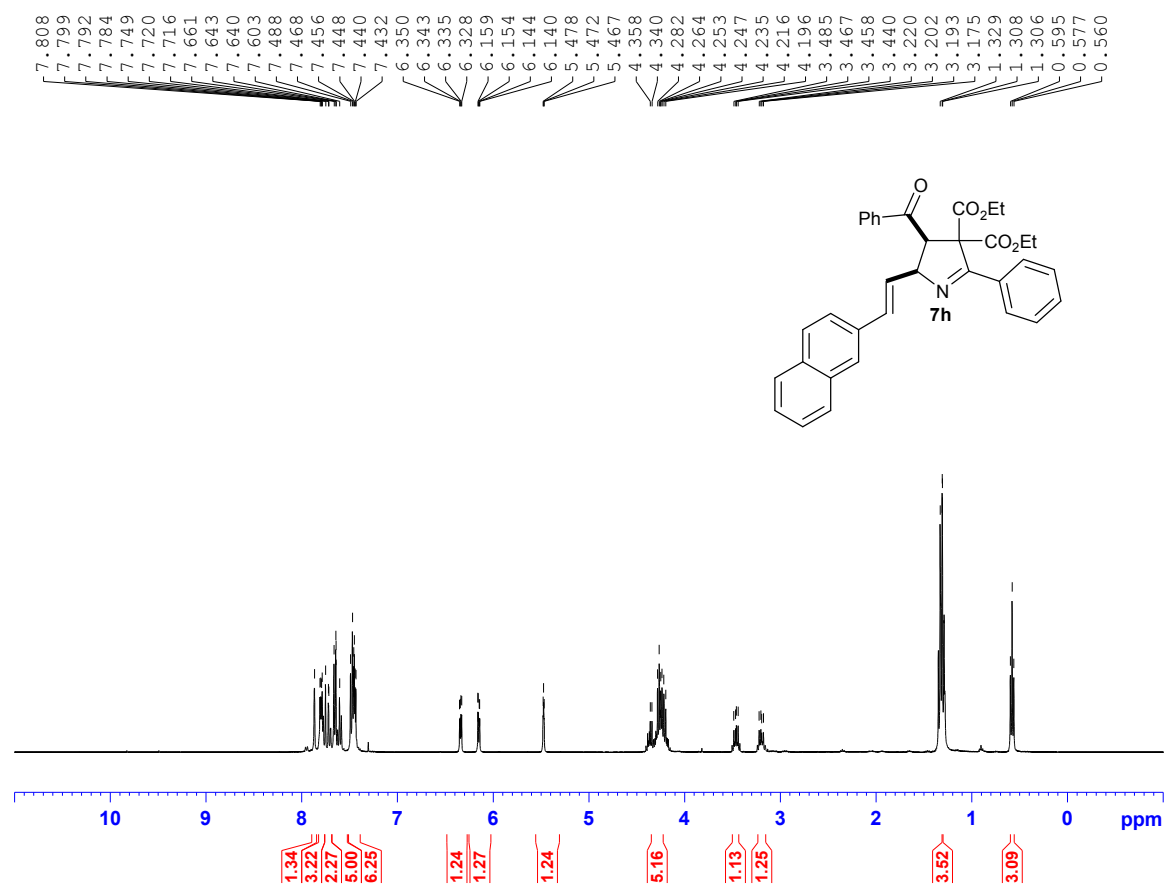

Figure 15. <sup>1</sup>H NMR (400 MHz, CDCl<sub>3</sub>) spectrum of **7h**



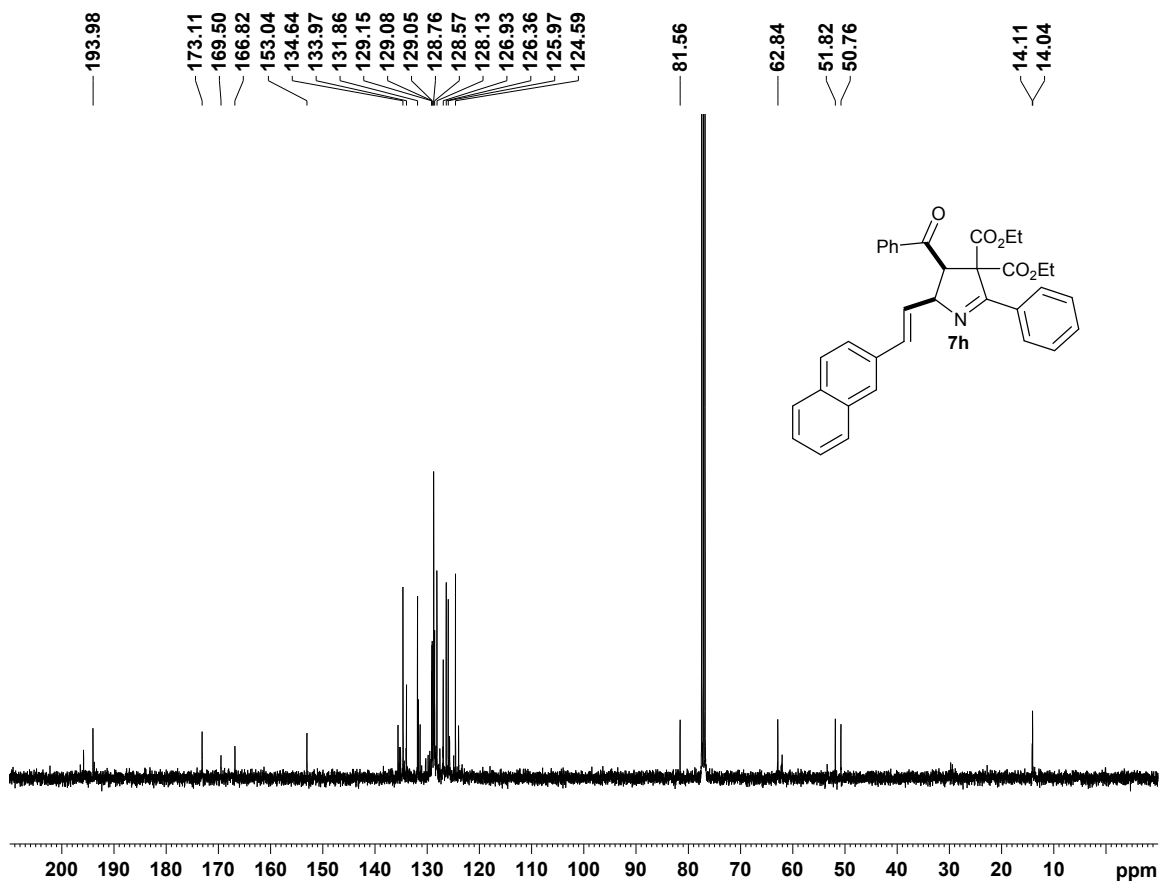

Figure 16.  $^{13}\text{C}$  NMR (100 MHz,  $\text{CDCl}_3$ ) spectrum of **7h**

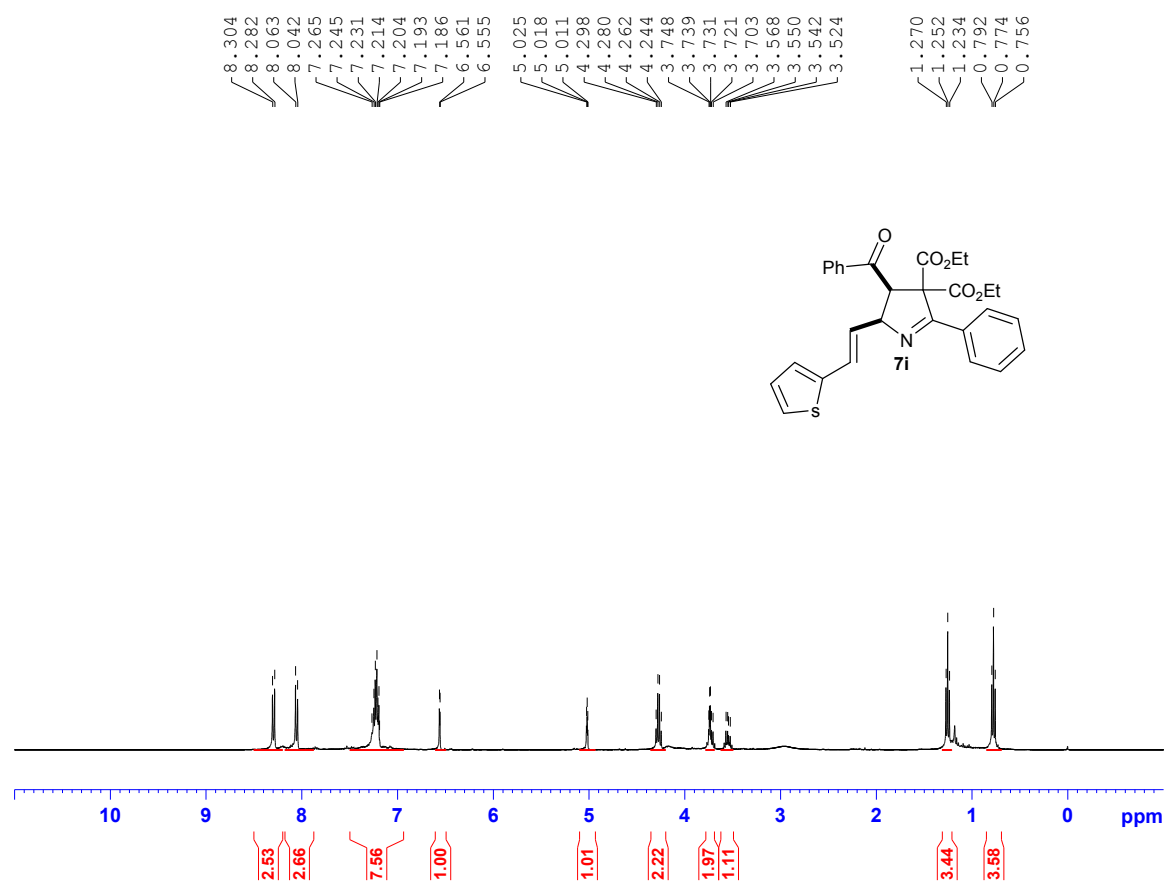

**Figure 17.** <sup>1</sup>H NMR (400 MHz, CDCl<sub>3</sub>) spectrum of **7i**

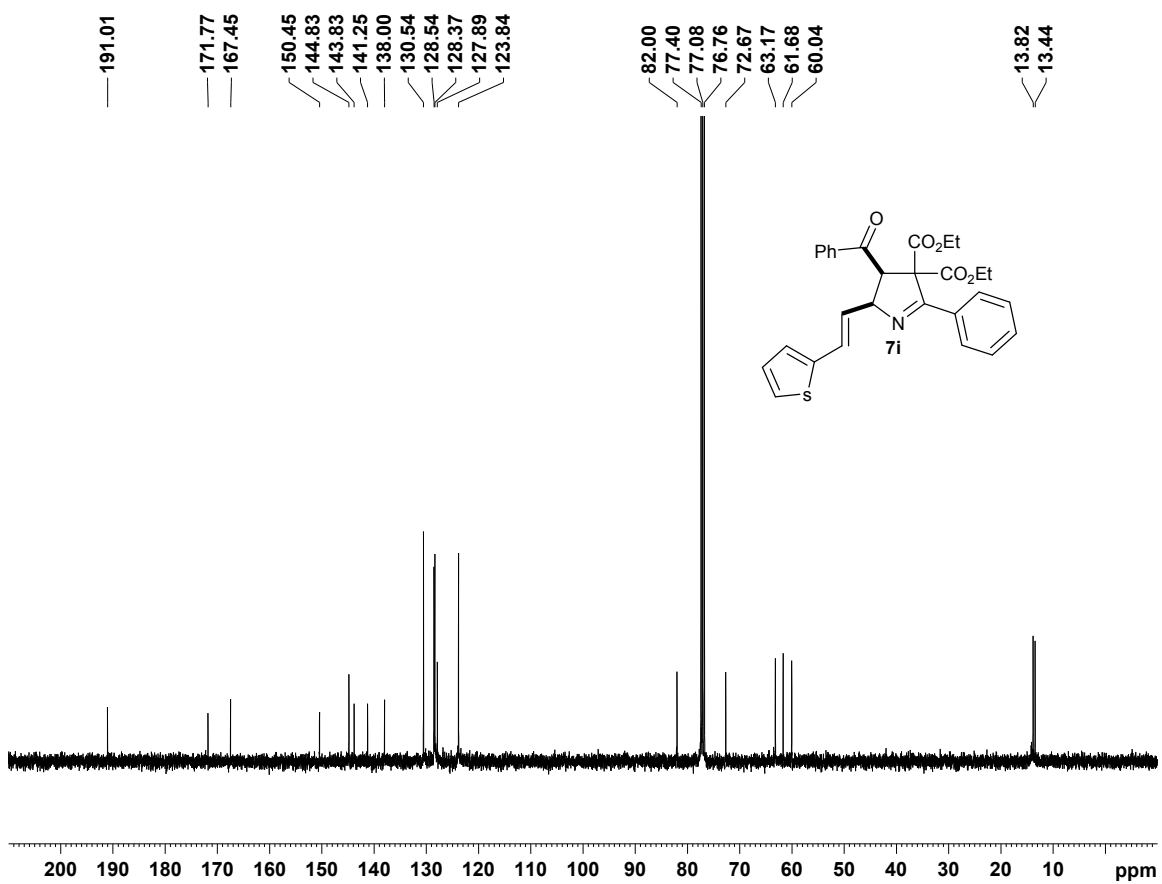

Figure 18.  $^{13}\text{C}$  NMR (100 MHz,  $\text{CDCl}_3$ ) spectrum of **7i**

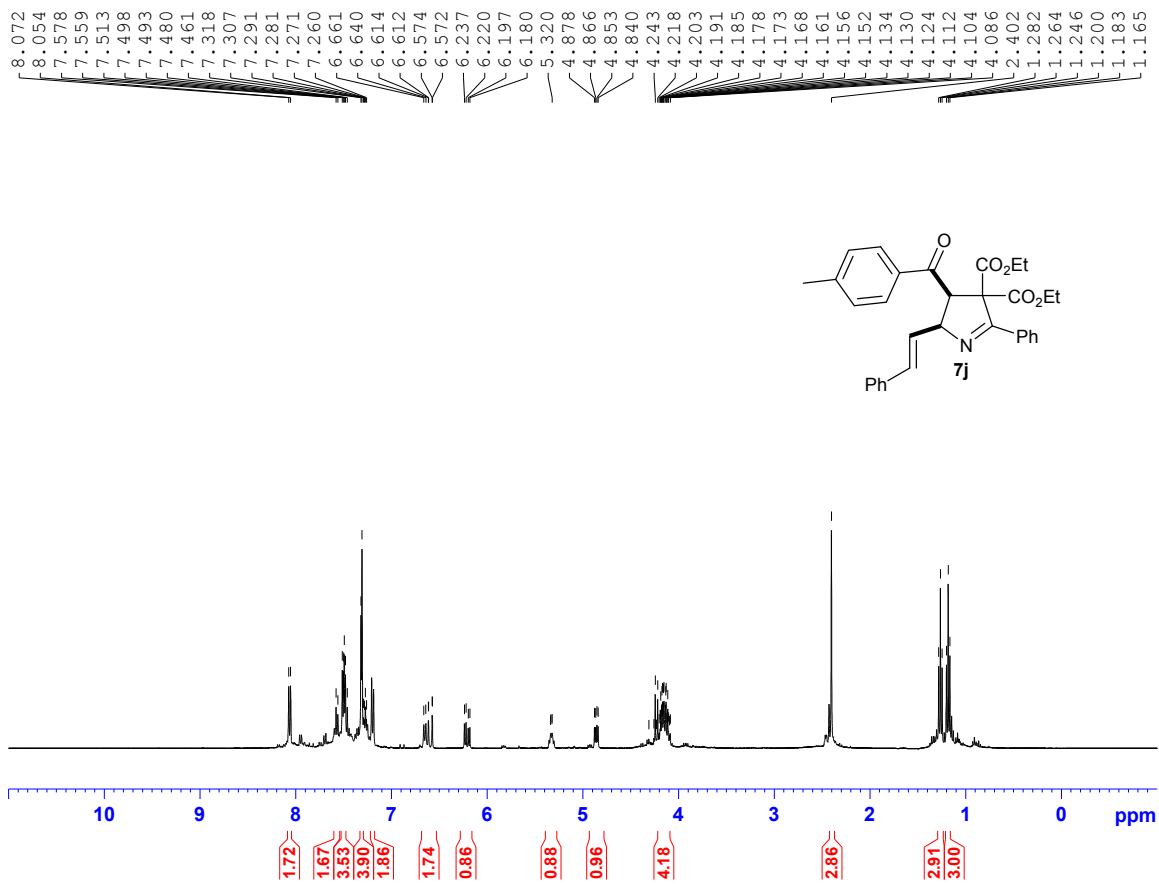

Figure 19. <sup>1</sup>H NMR (400 MHz, CDCl<sub>3</sub>) spectrum of 7j

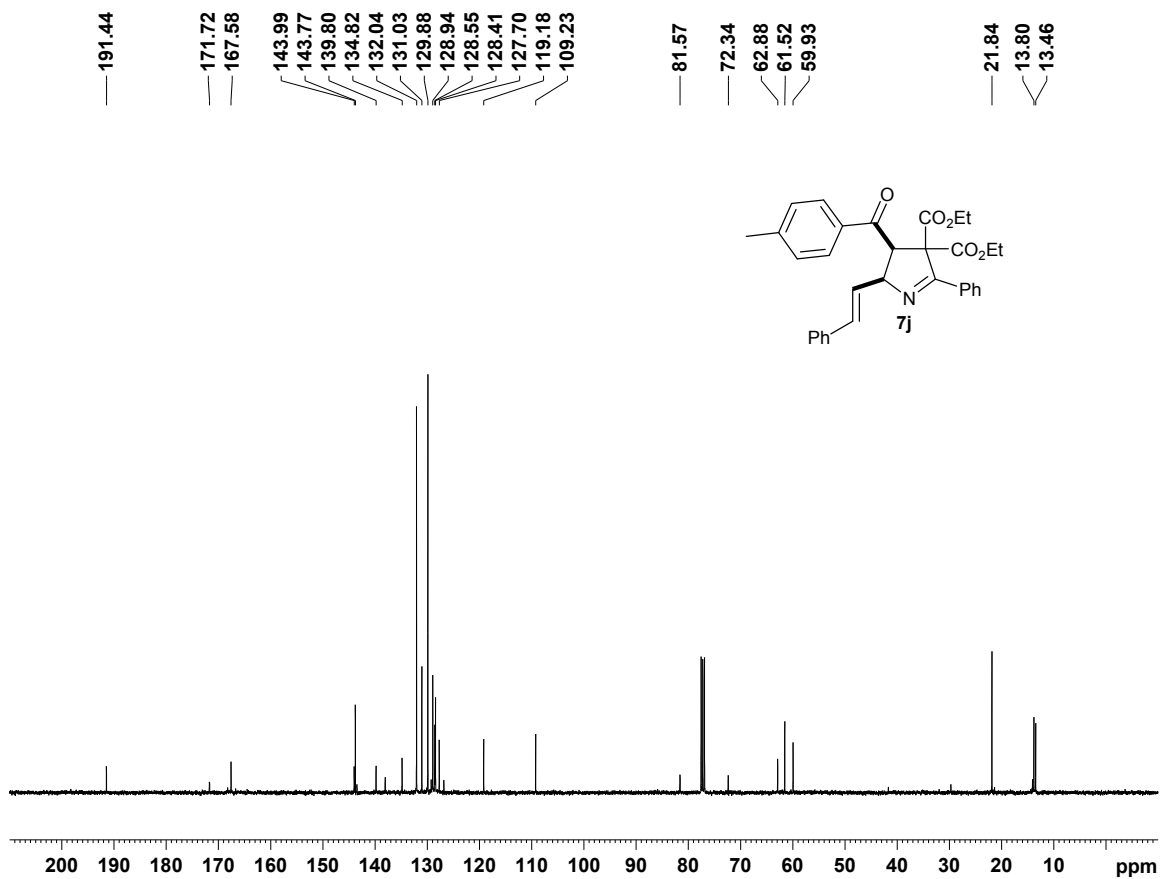

Figure 20.  $^{13}\text{C}$  NMR (100 MHz,  $\text{CDCl}_3$ ) spectrum of **7j**

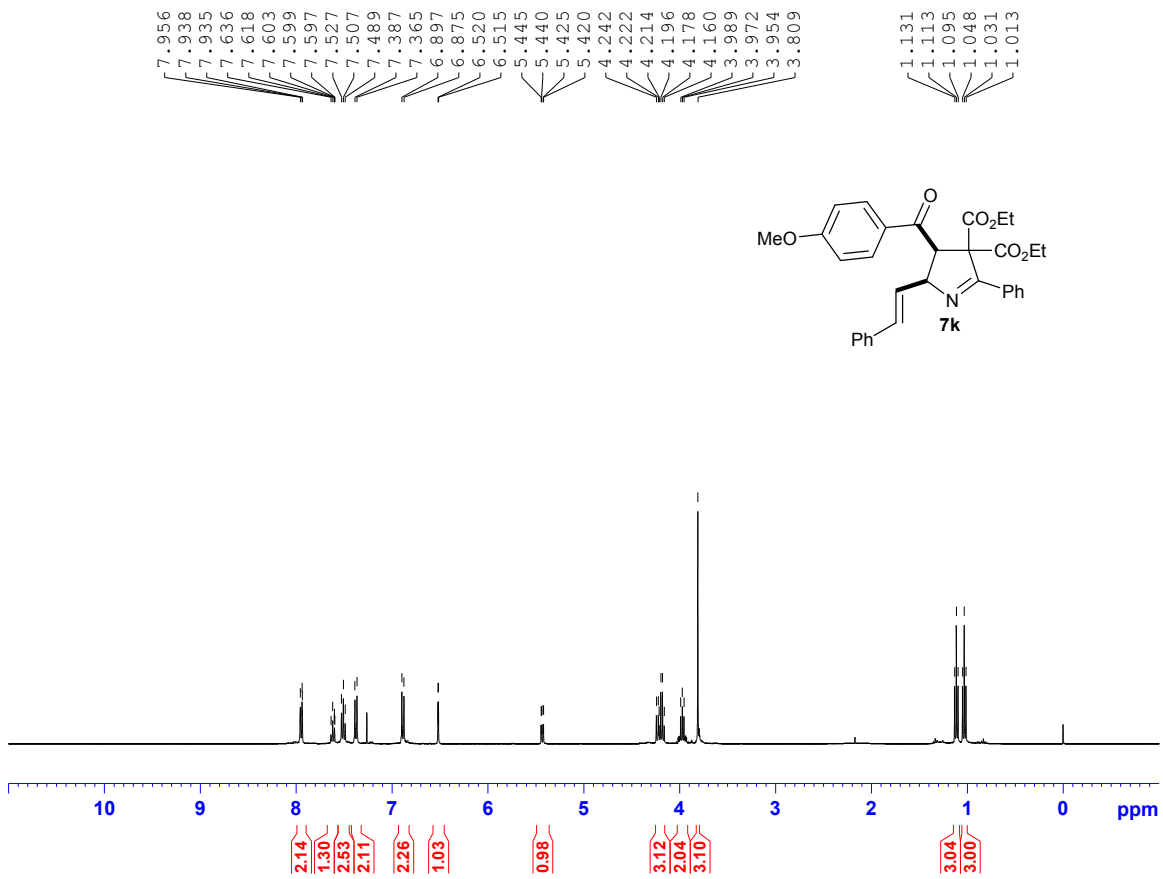

**Figure 21.** <sup>1</sup>H NMR (400 MHz, CDCl<sub>3</sub>) spectrum of **7k**

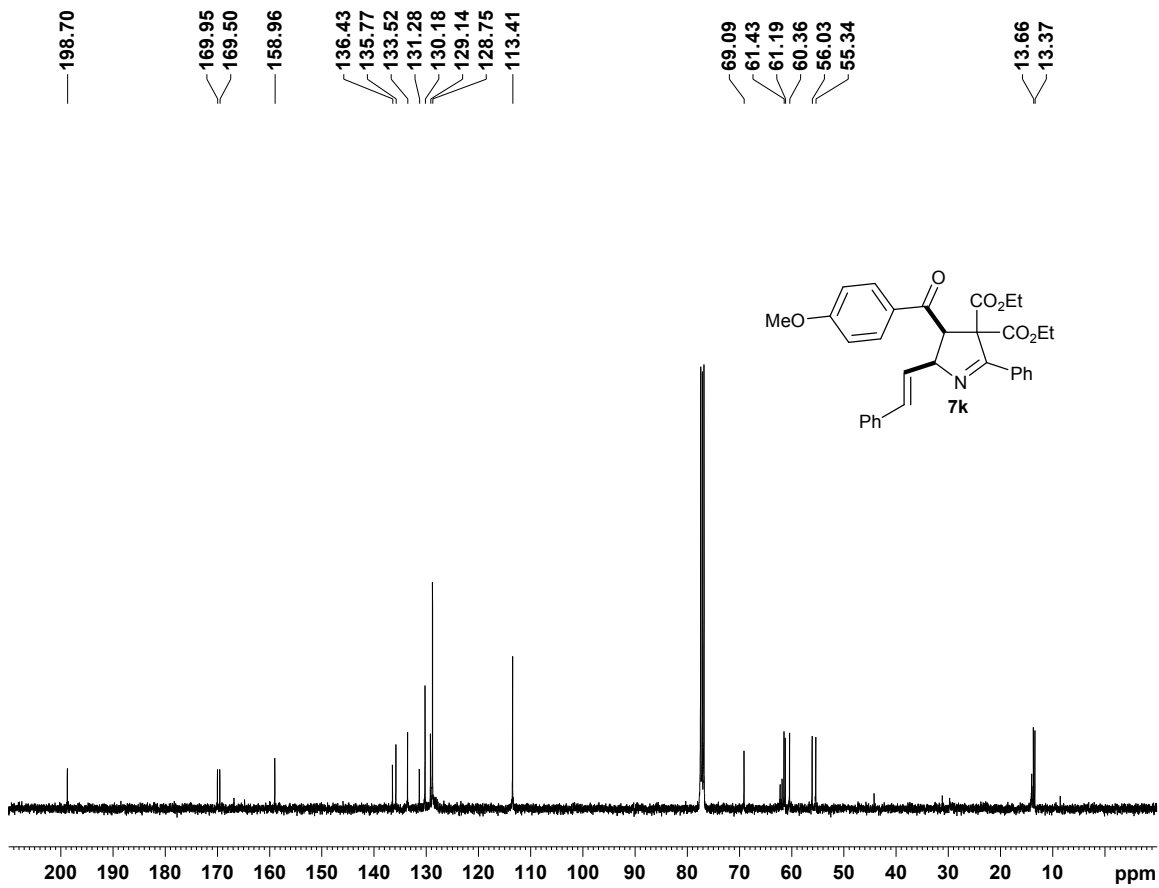

Figure 22.  $^{13}\text{C}$  NMR (100 MHz,  $\text{CDCl}_3$ ) spectrum of 7k

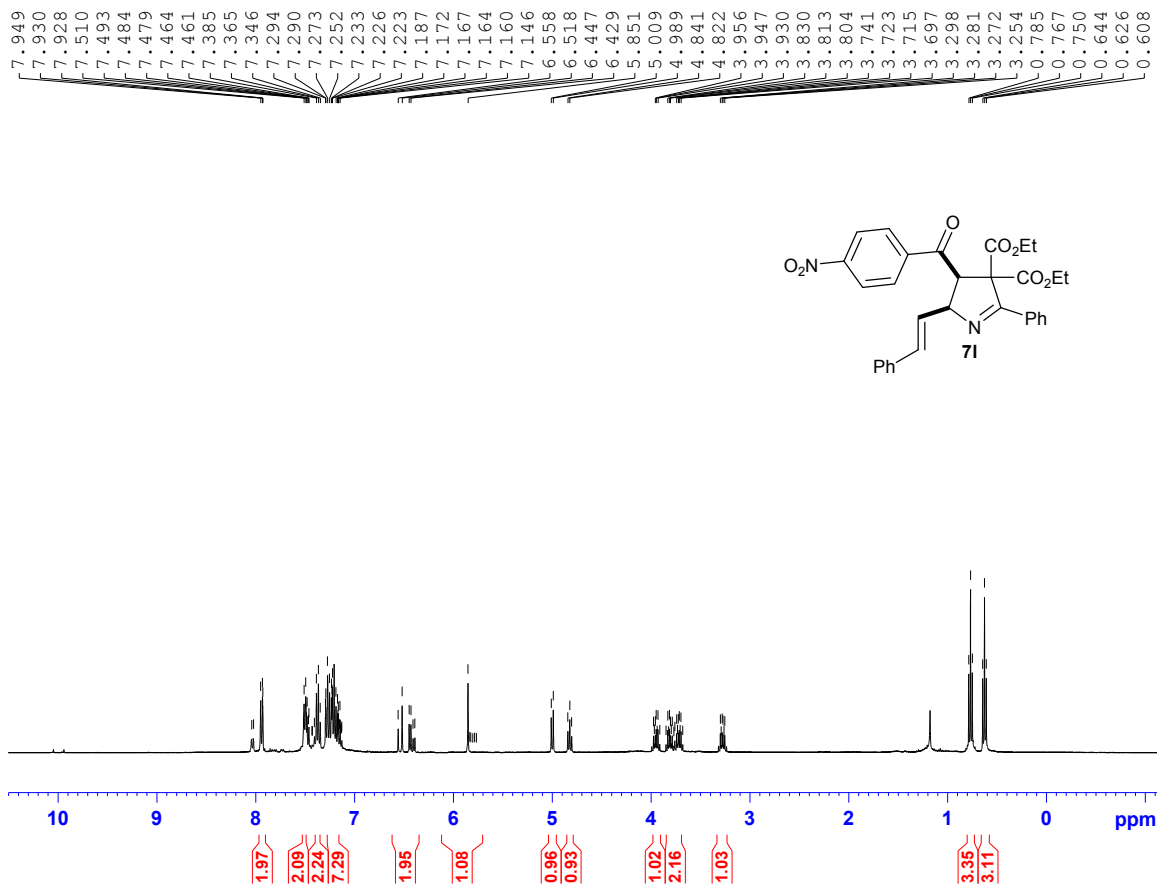

**Figure 23.** <sup>1</sup>H NMR (400 MHz, CDCl<sub>3</sub>) spectrum of **71**



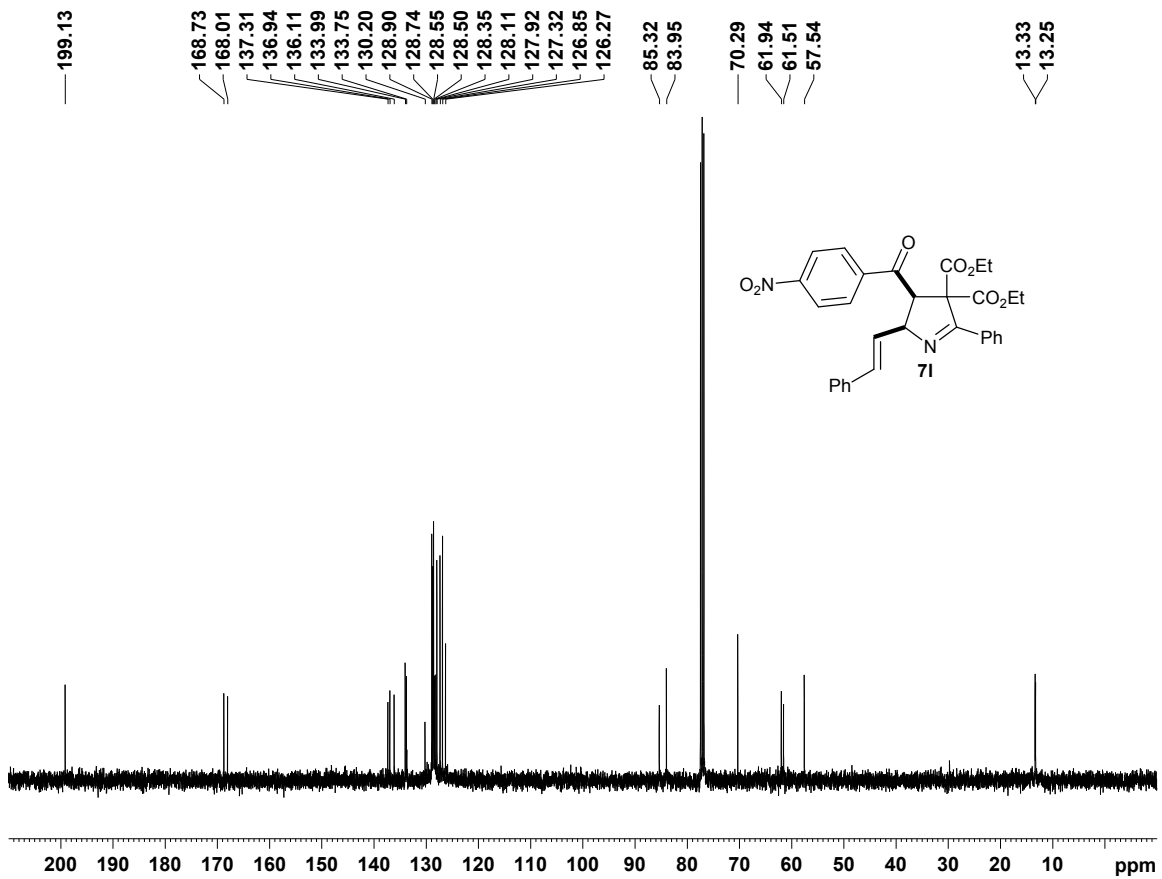

Figure 24.  $^{13}\text{C}$  NMR (100 MHz,  $\text{CDCl}_3$ ) spectrum of **71**

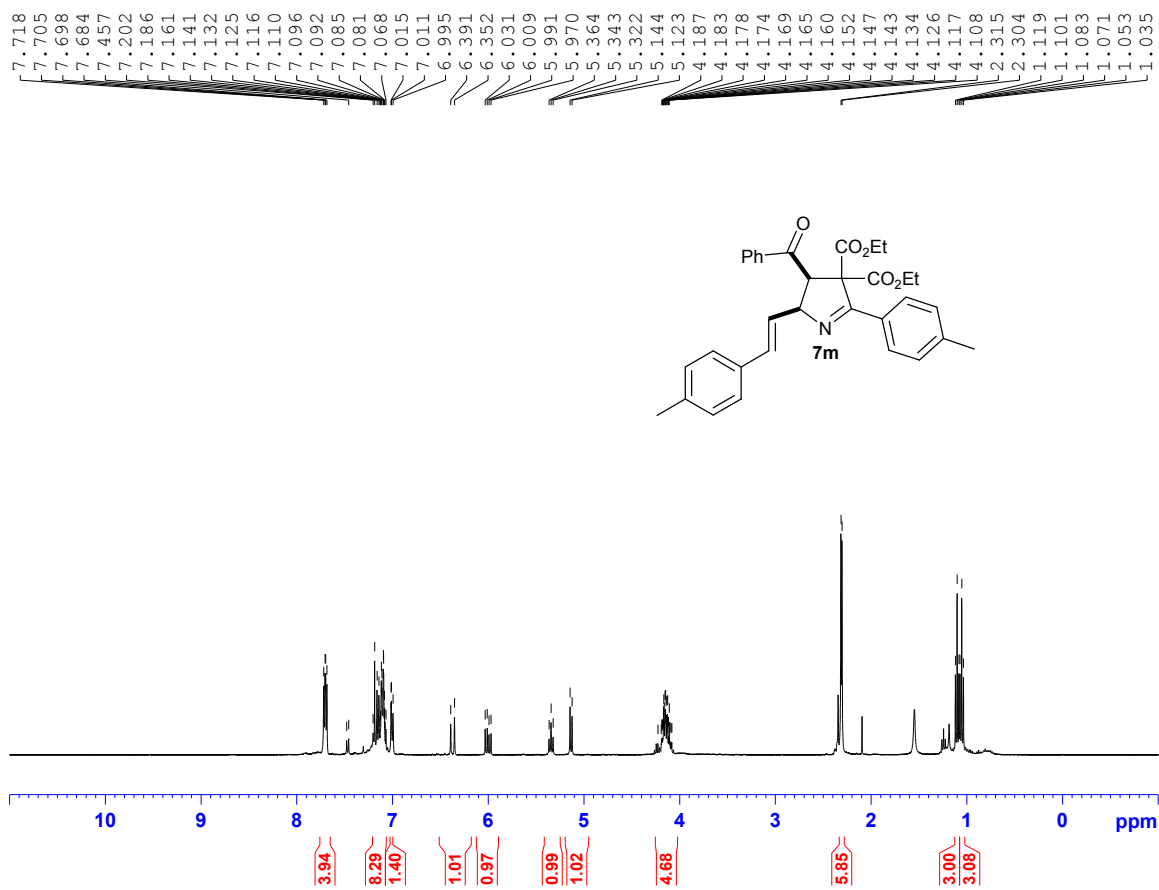

**Figure 25.** <sup>1</sup>H NMR (400 MHz, CDCl<sub>3</sub>) spectrum of **7m**

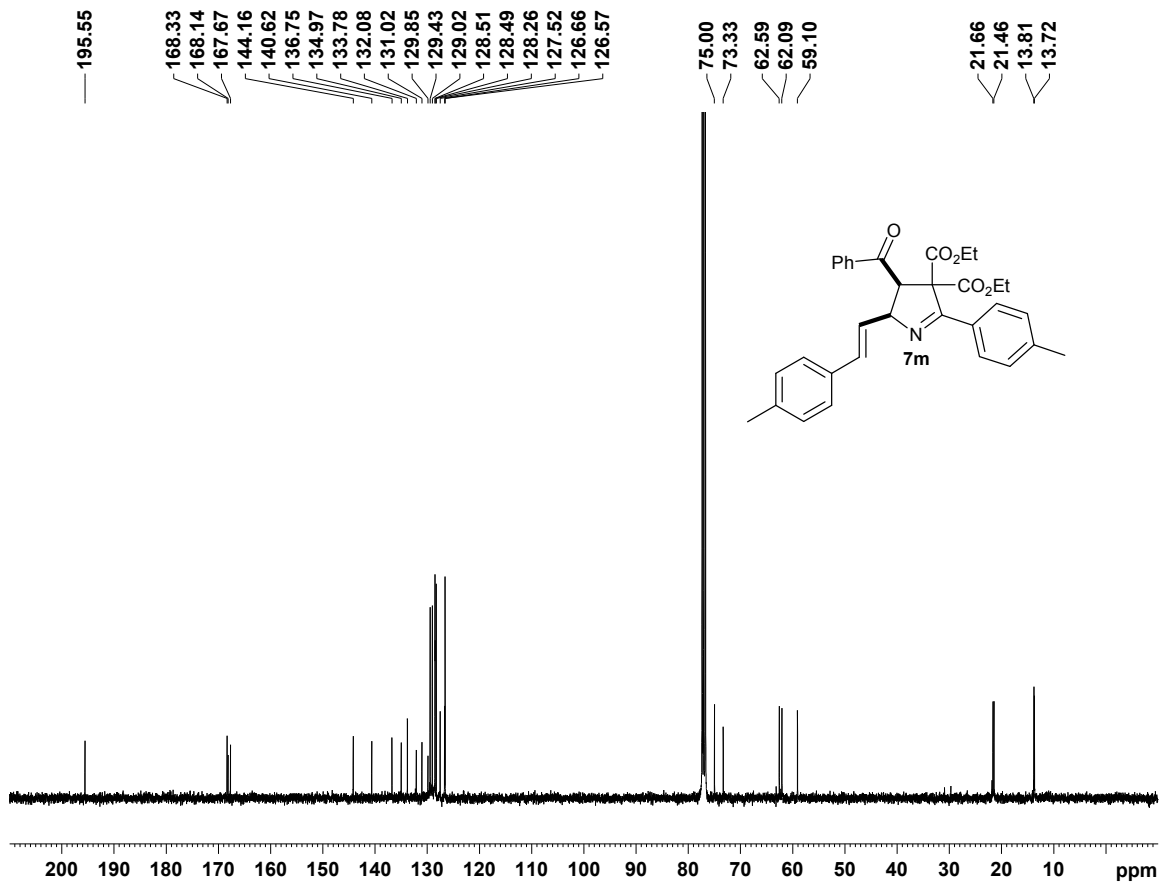

**Figure 26.** <sup>13</sup>C NMR (100 MHz, CDCl<sub>3</sub>) spectrum of **7m**

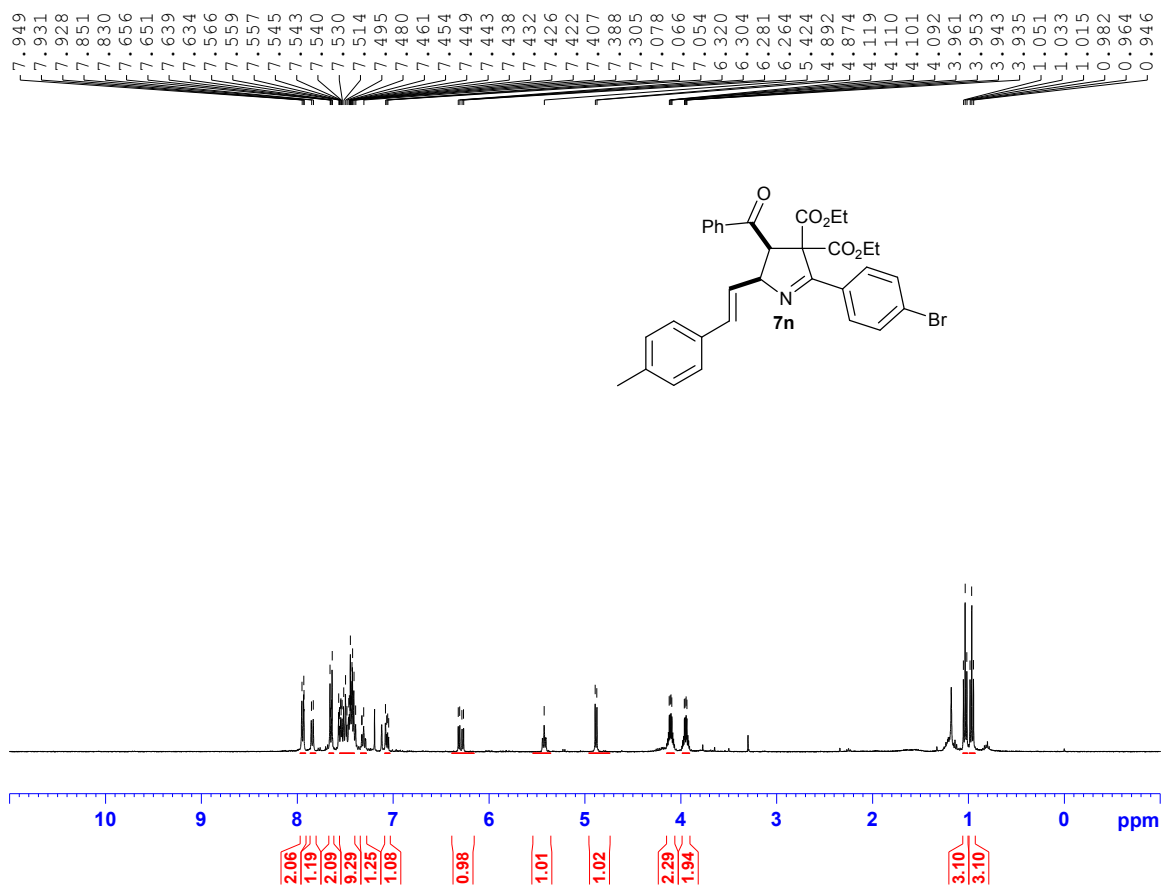

**Figure 27.** <sup>1</sup>H NMR (400 MHz, CDCl<sub>3</sub>) spectrum of **7n**

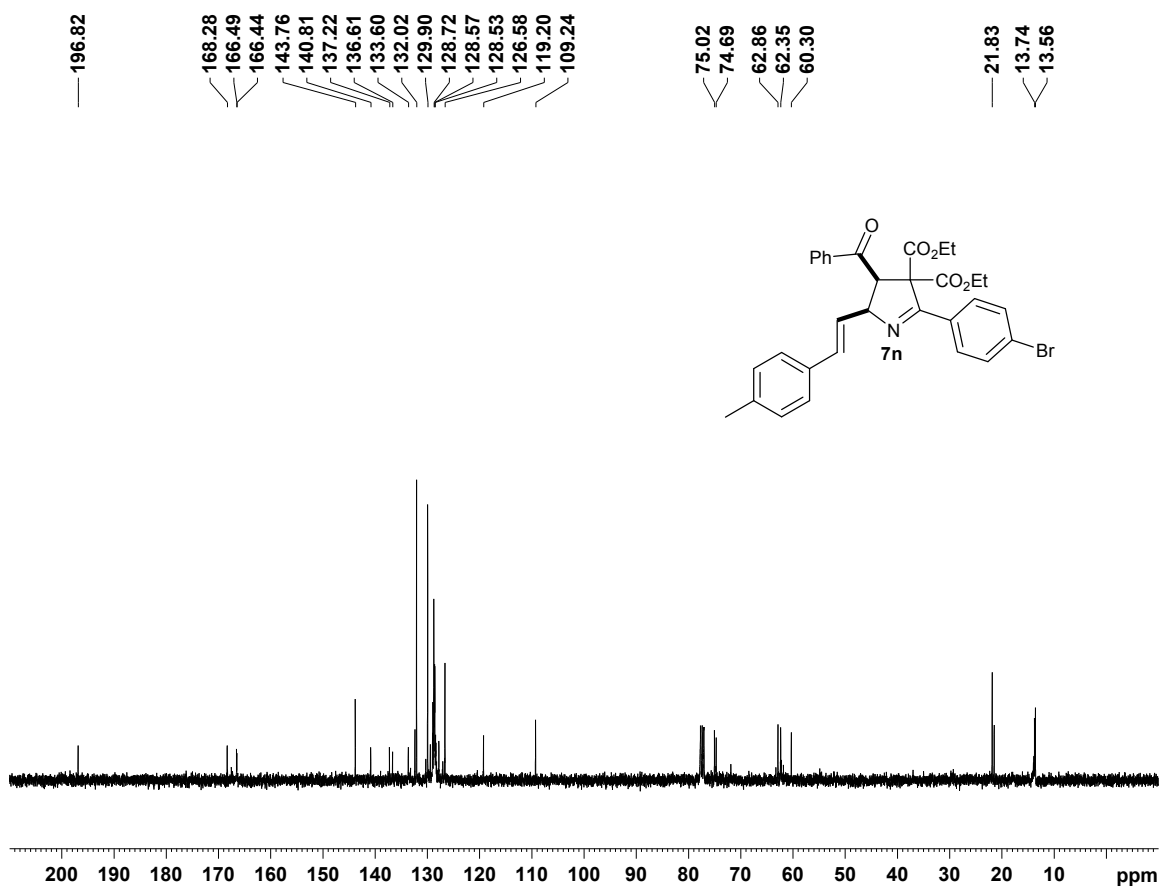

Figure 28.  $^{13}\text{C}$  NMR (100 MHz,  $\text{CDCl}_3$ ) spectrum of **7n**

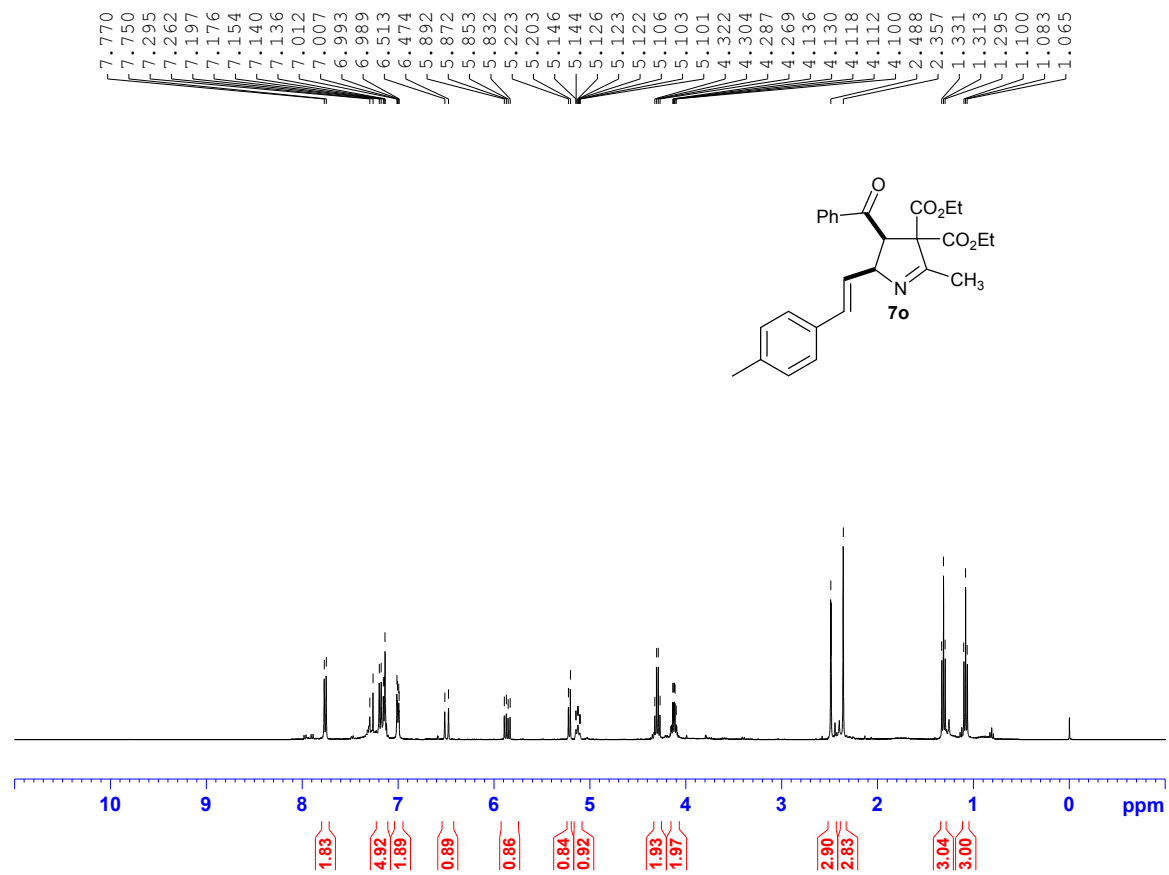

Figure 29. <sup>1</sup>H NMR (400 MHz, CDCl<sub>3</sub>) spectrum of **7o**

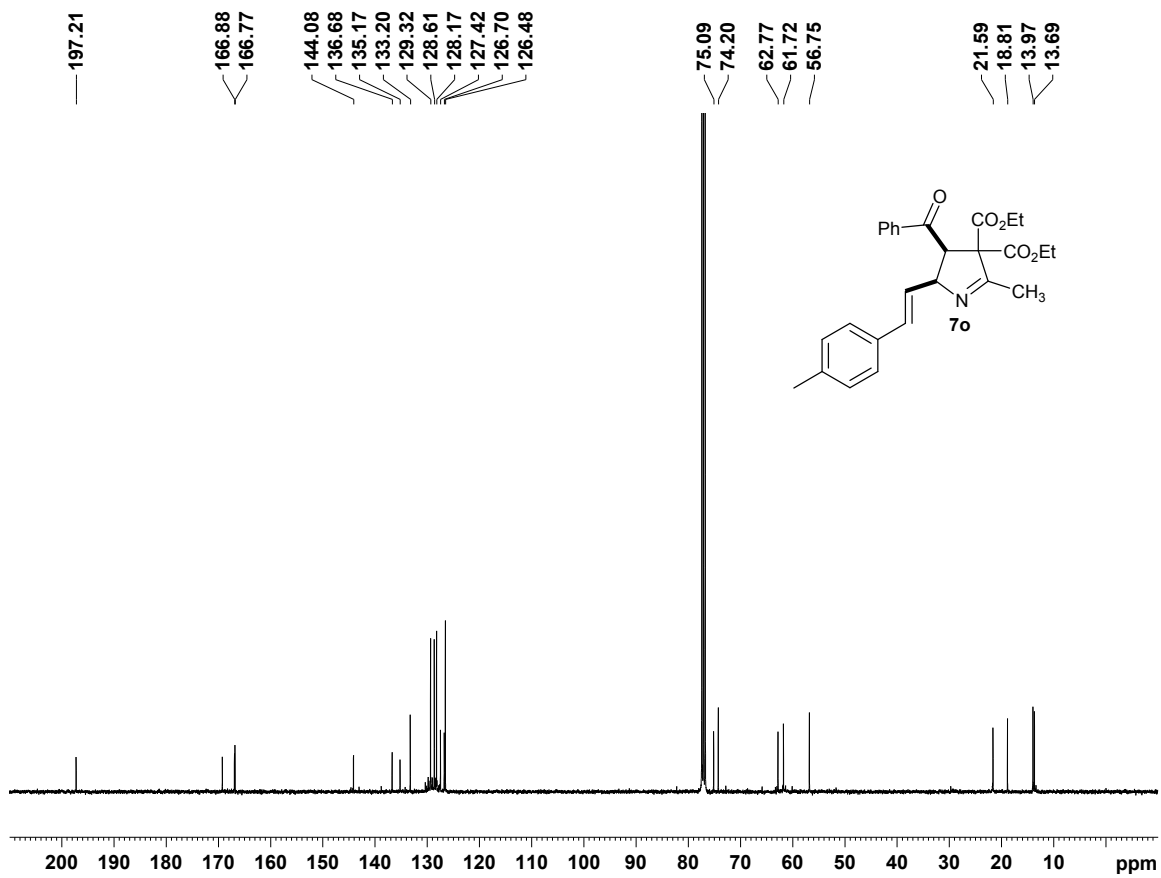

Figure 30.  $^{13}\text{C}$  NMR (100 MHz,  $\text{CDCl}_3$ ) spectrum of **7o**

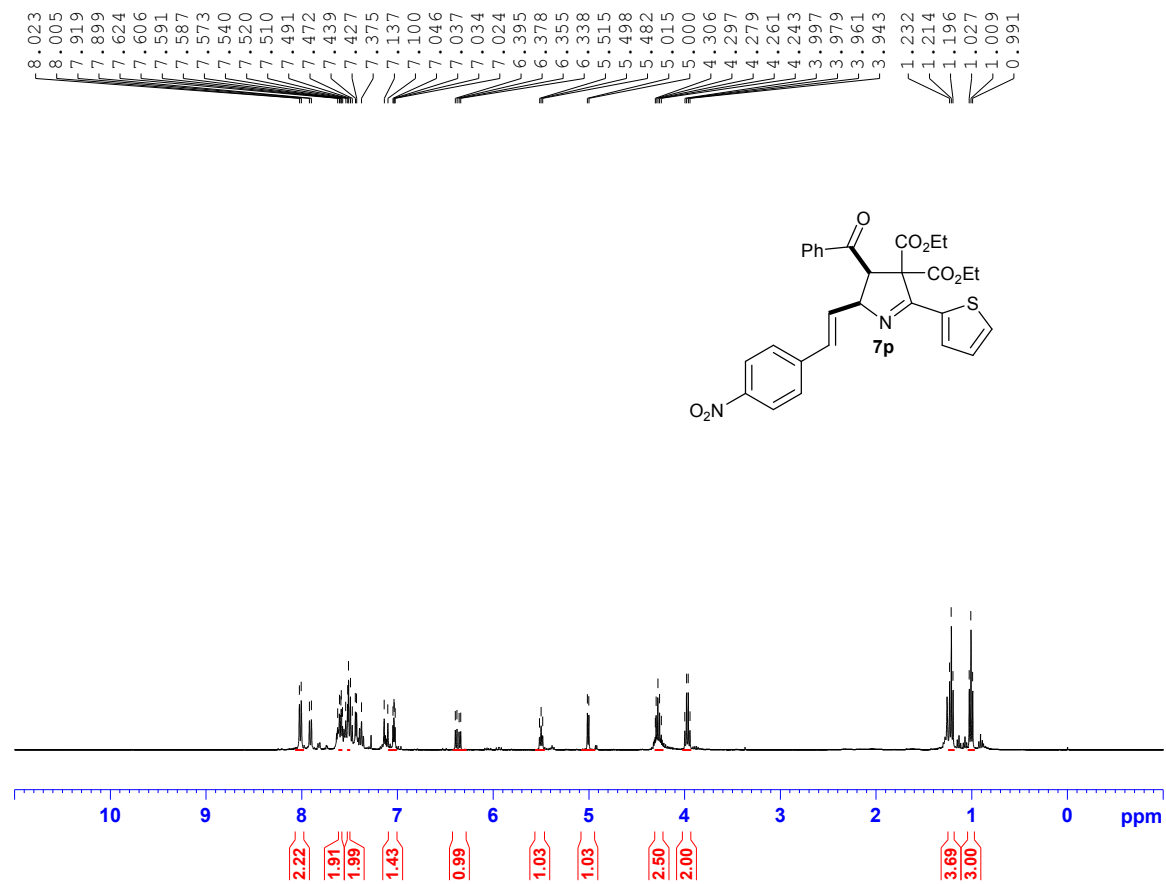

**Figure 31.**  $^1\text{H}$  NMR (400 MHz,  $\text{CDCl}_3$ ) spectrum of **7p**



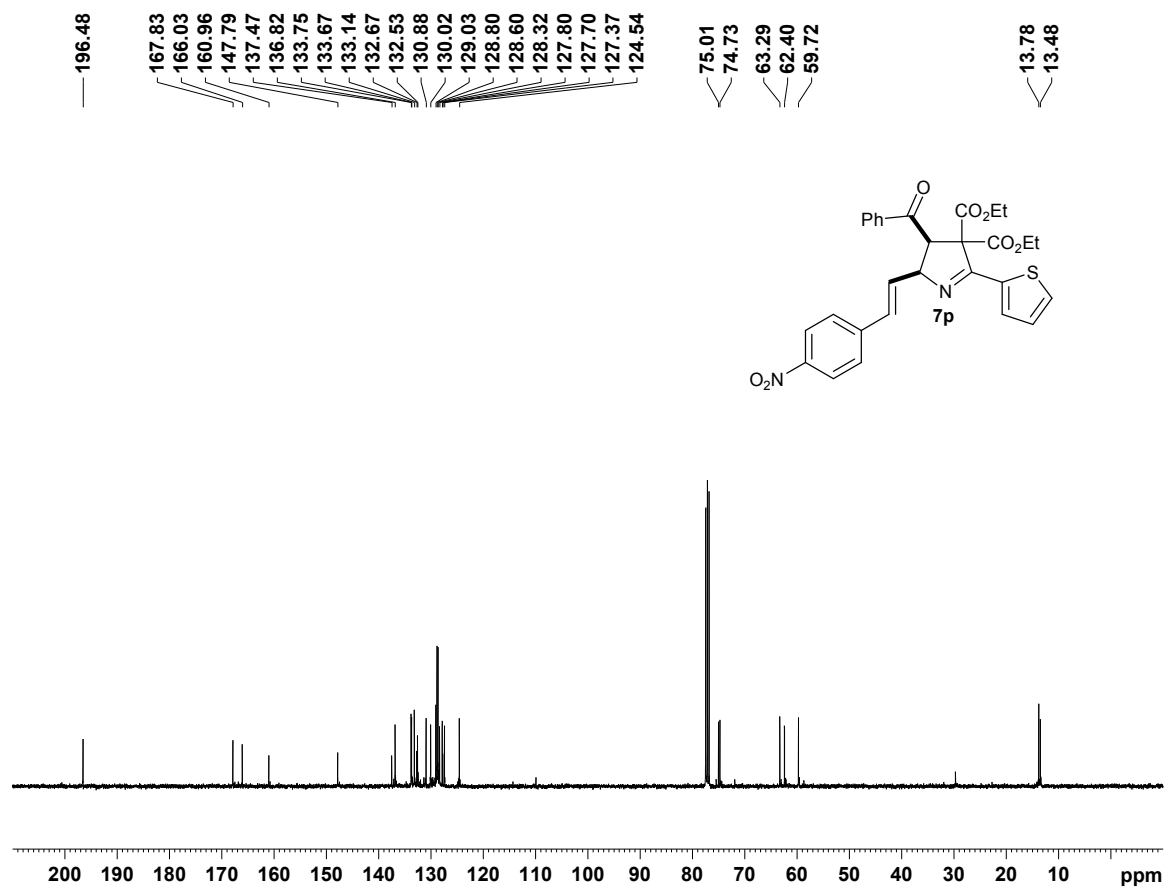

**Figure 32.** <sup>13</sup>C NMR (100 MHz, CDCl<sub>3</sub>) spectrum of **7p**

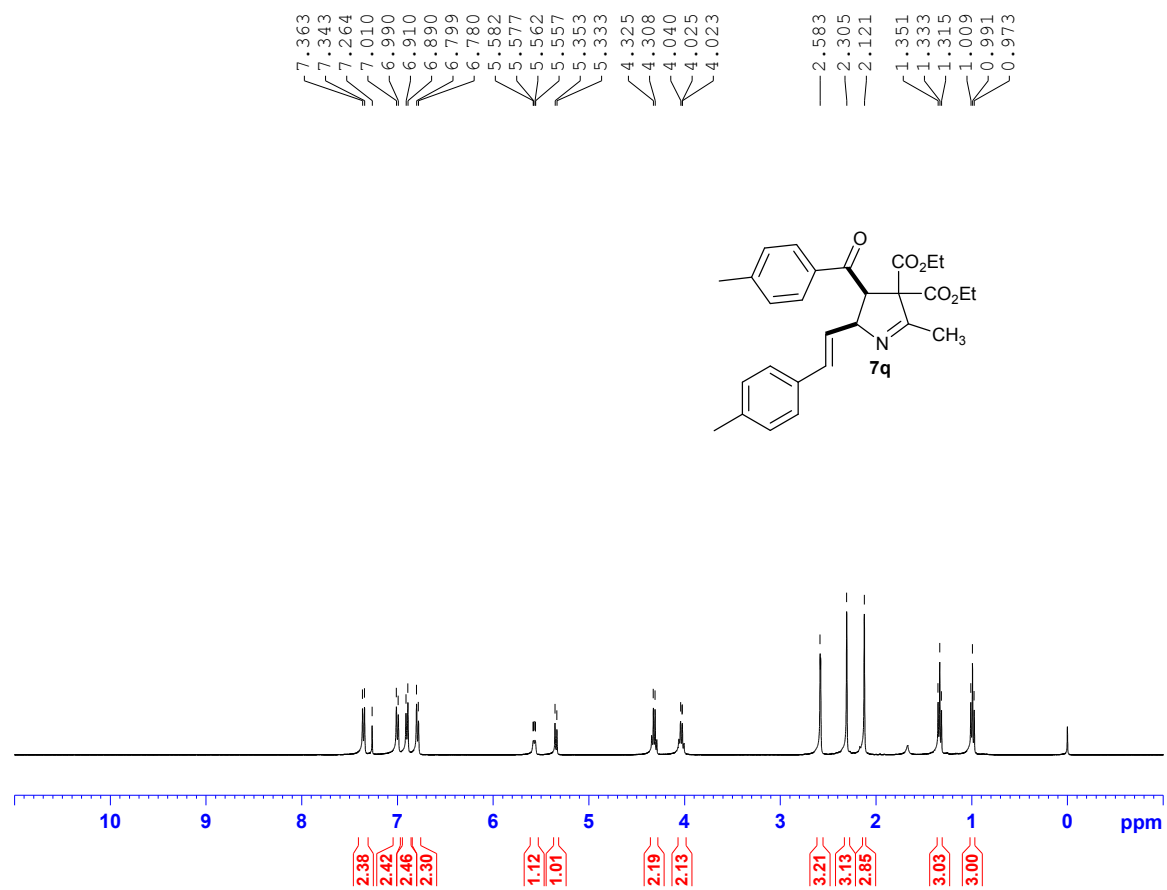

**Figure 33.** <sup>1</sup>H NMR (400 MHz, CDCl<sub>3</sub>) spectrum of **7q**

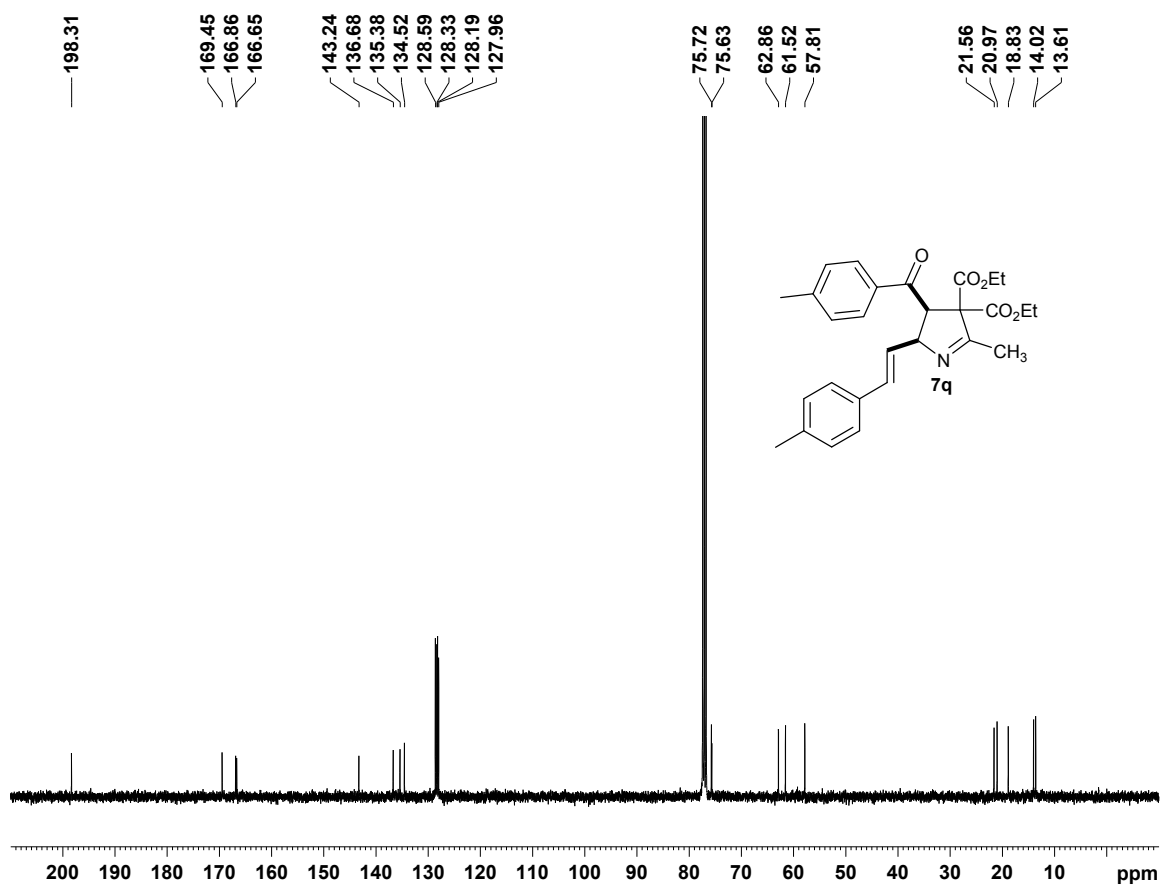

Figure 34. <sup>13</sup>C NMR (100 MHz, CDCl<sub>3</sub>) spectrum of **7q**

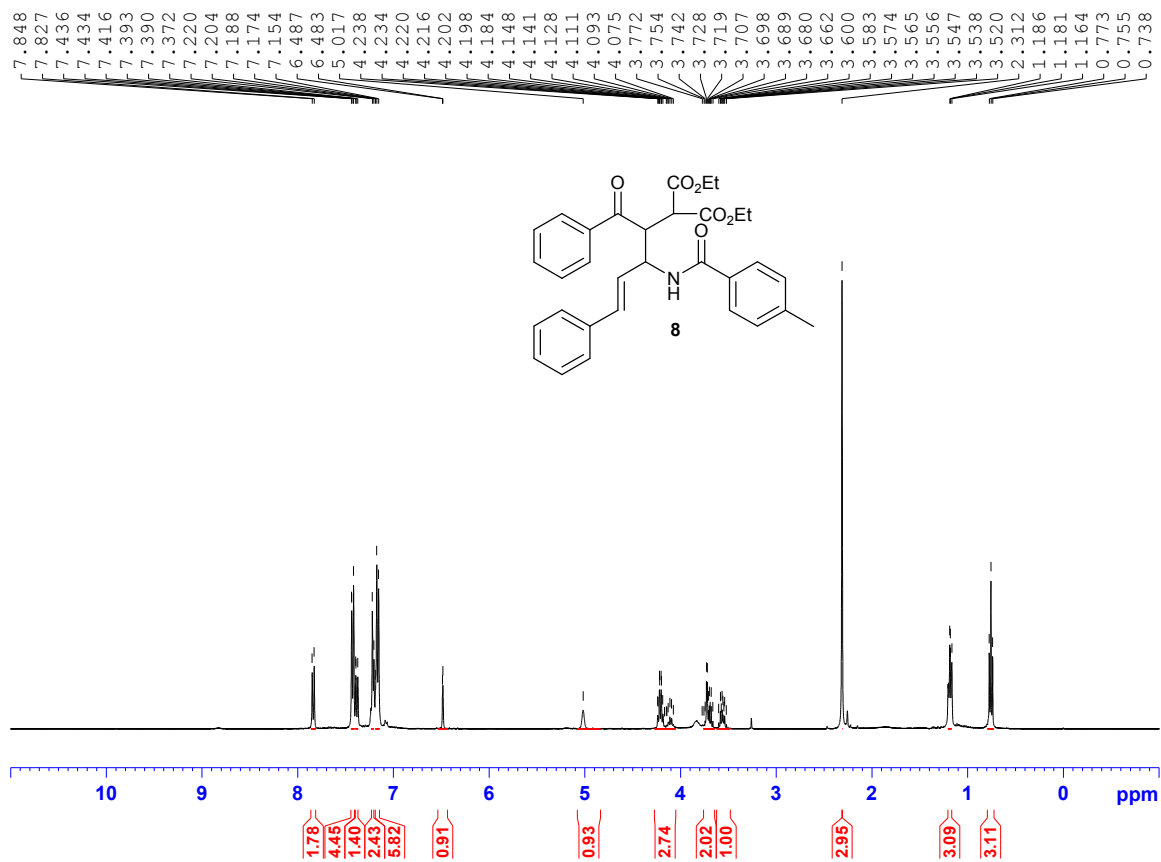

**Figure 35.**  $^1\text{H}$  NMR (400 MHz,  $\text{CDCl}_3$ ) spectrum of **8**

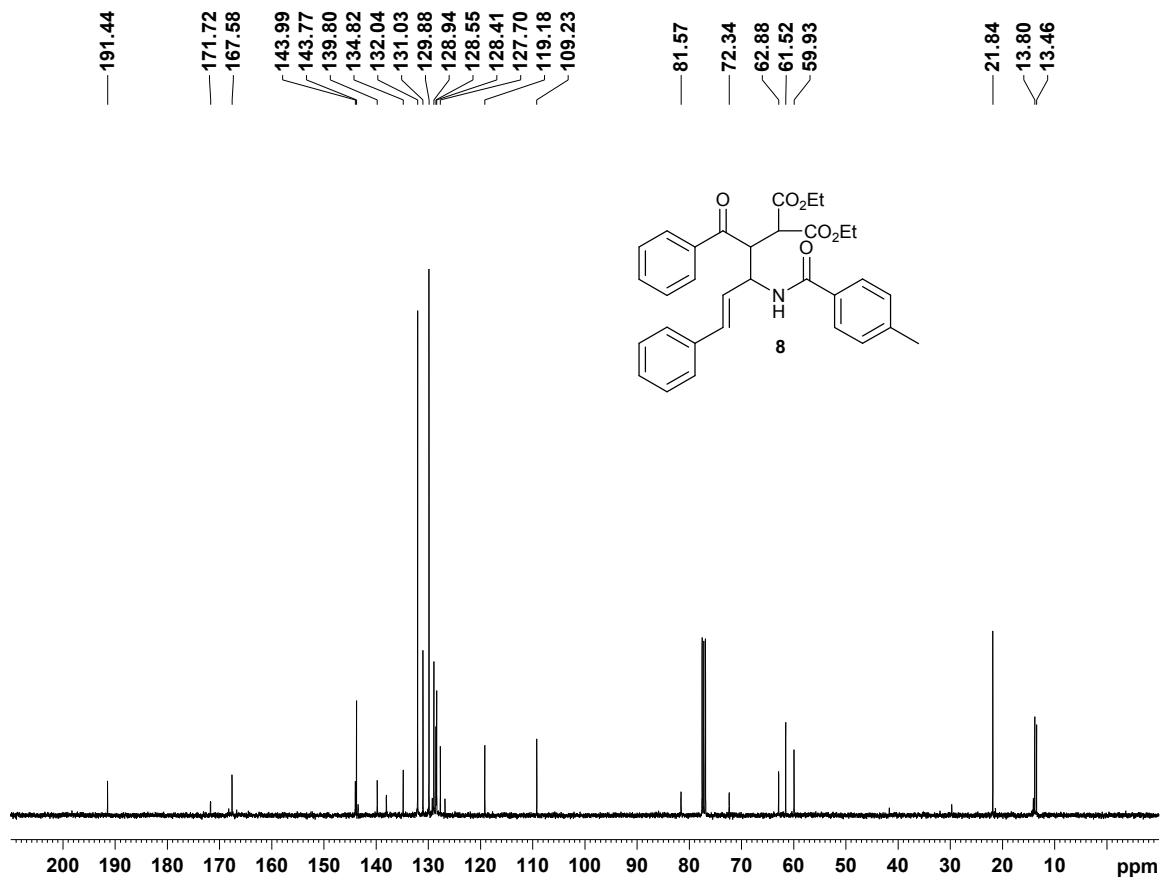

Figure 36.  $^{13}\text{C}$  NMR (100 MHz,  $\text{CDCl}_3$ ) spectrum of **8**
